# Supplementary material for: Chrysomya megacephala larvae feeding favourably influences manure microbiome, heavy metal stability and greenhouse gas emissions
Source: PubMed Central journal article supplement (PMC5902325; doi:10.1111/1751-7915.13253), 2018-03-14

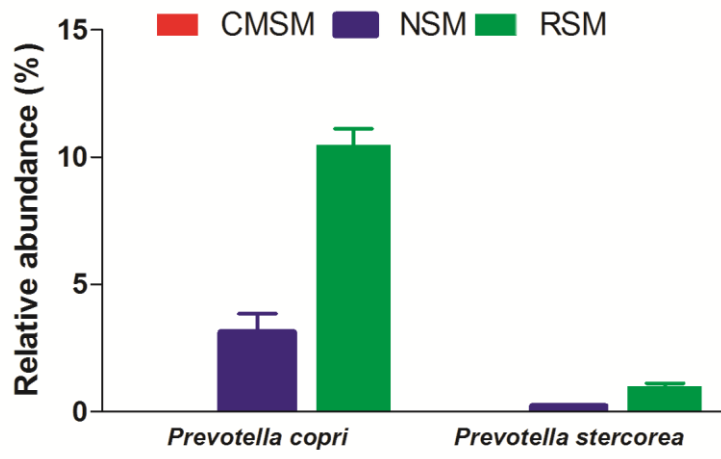

Supplement: MBT2-11-498-s001.pdf [file MBT2-11-498-s001.pdf]
