# Supplementary material for: Chrysomya megacephala larvae feeding favourably influences manure microbiome, heavy metal stability and greenhouse gas emissions
Source: PubMed Central journal article supplement (PMC5902325; doi:10.1111/1751-7915.13253), 2018-03-14
Supplement: MBT2-11-498-s003.pdf [file MBT2-11-498-s003.pdf]

| #OTUId  | Abundance | Taxonomy                                                                                                                 |
|---------|-----------|--------------------------------------------------------------------------------------------------------------------------|
| Otu729  | 20        | Bacteria;Firmicutes;Clostridia;Clostridiales;Ruminococcaceae                                                             |
| Otu1158 | 85        | Bacteria;Proteobacteria;Betaproteobacteria;Burkholderiales;Alcaligenaceae;Alcaligenes;Alcaligenes_faecalis               |
| Otu728  | 33        | Bacteria;Firmicutes;Clostridia;Clostridiales;Ruminococcaceae                                                             |
| Otu937  | 2         | Bacteria;Bacteroidetes;Bacteroidia;Bacteroidales                                                                         |
| Otu1081 | 13        | Bacteria;Bacteroidetes;Bacteroidia;Bacteroidales;Prevotellaceae;Prevotella;Prevotella_copri                              |
| Otu972  | 18        | Bacteria;Firmicutes;Clostridia;Clostridiales;Ruminococcaceae;Ruminococcus                                                |
| Otu649  | 18        | Bacteria;Bacteroidetes;Bacteroidia;Bacteroidales;Paraprevotellaceae;Prevotella                                           |
| Otu573  | 9         | Bacteria;Firmicutes;Clostridia;Clostridiales;Clostridiaceae;Clostridium                                                  |
| Otu985  | 2         | Bacteria;Firmicutes;Clostridia;Clostridiales;Veillonellaceae                                                             |
| Otu714  | 5         | Bacteria;Firmicutes;Clostridia;Clostridiales;Ruminococcaceae;Ruminococcus                                                |
| Otu828  | 4         | Bacteria;Firmicutes                                                                                                      |
| Otu829  | 7         | Bacteria;Bacteroidetes;Bacteroidia;Bacteroidales                                                                         |
| Otu981  | 6         | Bacteria;Bacteroidetes;Bacteroidia;Bacteroidales;S24-7                                                                   |
| Otu486  | 6         | Bacteria;Bacteroidetes;Bacteroidia;Bacteroidales;Bacteroidaceae;Bacteroides                                              |
| Otu983  | 11        | Bacteria;Firmicutes;Clostridia;Clostridiales;Ruminococcaceae                                                             |
| Otu715  | 3         | Bacteria;Firmicutes;Erysipelotrichi;Erysipelotrichales;Erysipelotrichaceae;Erysipelothrix                                |
| Otu822  | 2         | Bacteria;Proteobacteria;Deltaproteobacteria;Bdellovibrionales;Bdellovibrionaceae;Bdellovibrio;Bdellovibrio_bacteriovorus |
| Otu823  | 2         | Bacteria;Firmicutes;Clostridia;Clostridiales;Ruminococcaceae;Clostridium;Clostridium_methylpentosum                      |
| Otu820  | 12        | Bacteria;Spirochaetes;Spirochaetes;Spirochaetales;Spirochaetaceae;Treponema                                              |
| Otu487  | 24        | Bacteria;Tenericutes;Mollicutes;Acholeplasmatales;Acholeplasmataceae;Acholeplasma                                        |
| Otu826  | 4         | Bacteria;Firmicutes;Bacilli;Bacillales;Bacillaceae                                                                       |
| Otu716  | 9         | Bacteria;Firmicutes;Clostridia;Clostridiales                                                                             |
| Otu824  | 160       | Bacteria;Firmicutes;Clostridia;Clostridiales;Lachnospiraceae;Roseburia                                                   |
| Otu825  | 2         | Bacteria;Firmicutes;Clostridia;Clostridiales;Ruminococcaceae                                                             |
| Otu488  | 15        | Bacteria;Tenericutes;Mollicutes;Acholeplasmatales;Acholeplasmataceae                                                     |

Otu717 5 Bacteria;Firmicutes;Clostridia;Clostridiales;Christensenellaceae  
Otu489 19 Bacteria;Firmicutes;Clostridia;Clostridiales;Lachnospiraceae  
Otu710 12 Bacteria;Firmicutes;Clostridia;Clostridiales;Ruminococcaceae  
Otu1137 6 Bacteria;Tenericutes;Mollicutes;RF39  
Otu1089 392 Bacteria;Proteobacteria;Gammaproteobacteria;Pseudomonadales;Pseudomonadaceae  
Otu723 4 Bacteria;Firmicutes;Clostridia;Clostridiales;Peptococcaceae;rc4-4  
Otu711 3 Bacteria;Bacteroidetes;Bacteroidia;Bacteroidales;Porphyromonadaceae;Paludibacter  
Otu954 7 Bacteria;Actinobacteria;Actinobacteria;Actinomycetales;Microbacteriaceae  
Otu722 8 Bacteria;Firmicutes;Clostridia;Clostridiales;Ruminococcaceae  
Otu712 12 Bacteria;Firmicutes;Clostridia;Clostridiales;Lachnospiraceae  
Otu725 13 Bacteria;Firmicutes;Clostridia;Clostridiales;Ruminococcaceae  
Otu713 5 Bacteria;Firmicutes;Clostridia;Clostridiales;Christensenellaceae  
Otu964 6 Bacteria;Firmicutes;Clostridia;Clostridiales;Lachnospiraceae  
Otu510 15 Bacteria;Firmicutes;Clostridia;Clostridiales  
Otu876 3 Bacteria  
Otu727 2 Bacteria;Bacteroidetes;Bacteroidia;Bacteroidales  
Otu726 2 Bacteria;Firmicutes;Clostridia;Clostridiales;Tissierellaceae;Tepidimicrobium  
Otu766 6 Bacteria;Tenericutes;Mollicutes;Acholeplasmatales;Acholeplasmataceae;Acholeplasma  
Otu955 6 Bacteria;Bacteroidetes;Bacteroidia;Bacteroidales;Prevotellaceae;Prevotella  
Otu1042 4 Bacteria;Firmicutes;Clostridia;Clostridiales  
Otu1043 9 Bacteria;Firmicutes;Clostridia;Clostridiales  
Otu529 5 Bacteria;Firmicutes  
Otu528 9 Bacteria;Firmicutes;Erysipelotrichi;Erysipelotrichales;Erysipelotrichaceae;Erysipelothrix  
Otu1046 2 Bacteria;Acidobacteria;Chloracidobacteria;RB41;Ellin6075  
Otu1047 49 Bacteria;Proteobacteria;Gammaproteobacteria;Pseudomonadales;Pseudomonadaceae  
Otu1044 2 Bacteria;Firmicutes

Otu1045 3 Bacteria  
Otu523 27 Bacteria;Bacteroidetes;Bacteroidia;Bacteroidales;S24-7  
Otu522 7 Bacteria;Firmicutes;Clostridia;Clostridiales;Tissierellaceae;Peptoniphilus  
Otu521 11 Bacteria;Proteobacteria;Gammaproteobacteria;Pseudomonadales;Pseudomonadaceae  
Otu520 10 Bacteria  
Otu527 18 Bacteria;Firmicutes;Clostridia;Clostridiales;Clostridiaceae;Clostridium  
Otu526 10 Bacteria;Firmicutes;Clostridia;Clostridiales;Acidaminobacteraceae;Guggenheimella  
Otu525 21 Bacteria;Firmicutes;Clostridia;Clostridiales;Ruminococcaceae;Ruminococcus  
Otu524 18 Bacteria;Bacteroidetes;Flavobacteriia;Flavobacteriales;Flavobacteriaceae;Gelidibacter  
Otu1092 7 Bacteria;Firmicutes;Bacilli;Lactobacillales;Aerococcaceae  
Otu1076 2 Bacteria;Firmicutes  
Otu318 32 Bacteria;Bacteroidetes;Bacteroidia;Bacteroidales;Paraprevotellaceae;Prevotella  
Otu319 37 Bacteria;Firmicutes;Clostridia;Clostridiales;Ruminococcaceae;Faecalibacterium  
Otu310 127 Bacteria;Firmicutes;Clostridia;Clostridiales  
Otu311 31 Bacteria;Firmicutes;Clostridia;Clostridiales;Tissierellaceae  
Otu312 25 Bacteria;Firmicutes;Clostridia;Clostridiales;Ruminococcaceae  
Otu313 32 Bacteria;Proteobacteria;Gammaproteobacteria;Aeromonadales;Succinivibrionaceae;Succinivibrio  
Otu314 50 Bacteria;Firmicutes;Clostridia;Clostridiales;Ruminococcaceae;Oscillospira  
Otu315 50 Bacteria;Bacteroidetes;Bacteroidia;Bacteroidales  
Otu316 28 Bacteria;Proteobacteria;Gammaproteobacteria;Pseudomonadales;Pseudomonadaceae  
Otu317 43 Bacteria;Bacteroidetes;Bacteroidia;Bacteroidales;S24-7  
Otu610 42 Bacteria;Firmicutes;Clostridia;Clostridiales;Ruminococcaceae  
Otu417 28 Bacteria;Firmicutes;Clostridia;Clostridiales;Christensenellaceae  
Otu416 13 Bacteria;Fusobacteria;Fusobacteriia;Fusobacteriales;Fusobacteriaceae;Fusobacterium  
Otu415 21 Bacteria;Verrucomicrobia;Verruco-5;WCHB1-41;RFP12  
Otu414 21 Bacteria;Firmicutes;Clostridia;Clostridiales;Ruminococcaceae;Oscillospira

Otu413 35 Bacteria;Bacteroidetes;Bacteroidia;Bacteroidales;Porphyromonadaceae;Dysgonomonas  
Otu412 12 Bacteria;Firmicutes;AHT28  
Otu411 17 Bacteria;Firmicutes;Clostridia;Clostridiales;Lachnospiraceae  
Otu410 9 Bacteria;Bacteroidetes;Flavobacteriia;Flavobacteriales;Weeksellaceae  
Otu794 2 Bacteria;Firmicutes;Clostridia;Clostridiales;Ruminococcaceae  
Otu795 5 Bacteria;Tenericutes;Mollicutes;RF39  
Otu796 12 Bacteria;Firmicutes;Clostridia;Clostridiales;Ruminococcaceae  
Otu797 8 Bacteria;Firmicutes;Clostridia;Clostridiales;Ruminococcaceae  
Otu790 31 Bacteria;Cyanobacteria;4C0d-2;YS2  
Otu370 12 Bacteria  
Otu419 39 Bacteria;Firmicutes;Clostridia;Clostridiales  
Otu418 11 Bacteria;Firmicutes;Clostridia;Clostridiales;Mogibacteriaceae;Mogibacterium  
Otu895 182 Bacteria;Firmicutes;Clostridia;Clostridiales;Ruminococcaceae  
Otu1036 4 Bacteria;Firmicutes;Clostridia;Clostridiales;Tissierellaceae;GW-34  
Otu1035 7 Bacteria;Bacteroidetes;Bacteroidia;Bacteroidales;S24-7  
Otu371 16 Bacteria;Tenericutes;Mollicutes;Acholeplasmatales;Acholeplasmataceae;Acholeplasma  
Otu1033 3 Bacteria;Firmicutes;Clostridia;Clostridiales;Eubacteriaceae;Anaerofustis  
Otu1032 5 Bacteria;Firmicutes;Clostridia;Clostridiales  
Otu558 6 Bacteria;Bacteroidetes;Flavobacteriia;Flavobacteriales;Weeksellaceae;Wautersiella  
Otu559 15 Bacteria;Firmicutes  
Otu556 4 Bacteria;Firmicutes;Bacilli;Haloplasmatales;Haloplasmataceae  
Otu557 6 Bacteria;Firmicutes;Clostridia;Clostridiales;Tissierellaceae  
Otu554 5 Bacteria;Actinobacteria;Coriobacteriia;Coriobacteriales;Coriobacteriaceae  
Otu555 10 Bacteria;Firmicutes;Clostridia;Clostridiales  
Otu552 24 Bacteria;Bacteroidetes;Bacteroidia;Bacteroidales;Porphyromonadaceae;Dysgonomonas  
Otu553 14 Bacteria;Bacteroidetes;Sphingobacteriia;Sphingobacteriales;Sphingobacteriaceae

Otu550 31 Bacteria;Firmicutes;Clostridia;Clostridiales;Ruminococcaceae;Ruminococcus  
Otu551 30 Bacteria;Bacteroidetes;Bacteroidia;Bacteroidales;Prevotellaceae;Prevotella  
Otu776 12 Bacteria;Firmicutes;Clostridia;Clostridiales;Lachnospiraceae;Blautia  
Otu777 2 Bacteria;Firmicutes;Clostridia;Clostridiales;Lachnospiraceae  
Otu774 14 Bacteria;Spirochaetes;Spirochaetes;Sphaerochaetales;Sphaerochaetaceae;Sphaerochaeta  
Otu775 6 Bacteria;Firmicutes;Clostridia;Clostridiales;Ruminococcaceae  
Otu772 8 Bacteria;Verrucomicrobia;Verruco-5;WCHB1-41;RFP12  
Otu773 10 Bacteria;Firmicutes;Clostridia;Clostridiales;Lachnospiraceae;Blautia;Blautia\_producta  
Otu679 22 Bacteria;Bacteroidetes;Bacteroidia;Bacteroidales;Bacteroidaceae;Bacteroides  
Otu678 20 Bacteria;Firmicutes;Erysipelotrichi;Erysipelotrichales;Erysipelotrichaceae;RFN20  
Otu677 10 Bacteria;Firmicutes;Clostridia;Clostridiales;Ruminococcaceae  
Otu676 7 Bacteria;Actinobacteria;Coriobacteriia;Coriobacteriales;Coriobacteriaceae  
Otu675 14 Bacteria;Firmicutes;Clostridia;Clostridiales;Peptostreptococcaceae;Peptostreptococcus  
Otu674 18 Bacteria;Proteobacteria;Gammaproteobacteria;Xanthomonadales;Xanthomonadaceae  
Otu673 7 Bacteria;Bacteroidetes;Bacteroidia;Bacteroidales;BS11  
Otu672 5 Bacteria;Proteobacteria;Betaproteobacteria;Burkholderiales;Alcaligenaceae  
Otu671 364 Bacteria;Proteobacteria;Gammaproteobacteria;Pseudomonadales;Pseudomonadaceae  
Otu670 11 Bacteria;Firmicutes;Clostridia;Clostridiales;Tissierellaceae;GW-34  
Otu58 535 Bacteria;Proteobacteria;Gammaproteobacteria;Alteromonadales;Alteromonadaceae;BD2-13  
Otu59 500 Bacteria;Spirochaetes;Spirochaetes;Spirochaetales;Spirochaetaceae;Treponema  
Otu986 6 Bacteria;Firmicutes;Clostridia;Clostridiales;Tissierellaceae  
Otu389 41 Bacteria;Firmicutes;Clostridia  
Otu388 16 Bacteria;Firmicutes;Clostridia;Clostridiales;Ruminococcaceae;Ruminococcus  
Otu50 495 Bacteria;Bacteroidetes;Bacteroidia;Bacteroidales;Bacteroidaceae  
Otu51 925 Bacteria;Bacteroidetes;Bacteroidia;Bacteroidales;Prevotellaceae;Prevotella  
Otu52 1068 Bacteria;Firmicutes;Bacilli;Bacillales;Planococcaceae

Otu53 873 Bacteria;Bacteroidetes;Sphingobacteriia;Sphingobacteriales;Sphingobacteriaceae  
Otu54 1636 Bacteria;Firmicutes;Clostridia;Clostridiales;Ruminococcaceae  
Otu55 587 Bacteria;Bacteroidetes;Bacteroidia;Bacteroidales  
Otu56 755 Bacteria;Bacteroidetes;Bacteroidia;Bacteroidales;Bacteroidaceae;Bacteroides  
Otu57 216 Bacteria;Firmicutes;Clostridia;Clostridiales;Ruminococcaceae;Oscillospira  
Otu379 16 Bacteria;Firmicutes;Clostridia;Clostridiales;Ruminococcaceae  
Otu982 2 Bacteria;Firmicutes;Clostridia;Clostridiales  
Otu251 44 Bacteria;Proteobacteria;Gammaproteobacteria;Enterobacteriales;Enterobacteriaceae  
Otu250 74 Bacteria;Proteobacteria;Alphaproteobacteria;Sphingomonadales;Sphingomonadaceae;Sphingopyxis  
Otu253 36 Bacteria;Bacteroidetes;Bacteroidia;Bacteroidales;Paraprevotellaceae;Prevotella  
Otu252 62 Bacteria;Bacteroidetes;Bacteroidia;Bacteroidales;Prevotellaceae;Prevotella  
Otu255 90 Bacteria;Firmicutes;Erysipelotrichi;Erysipelotrichales;Erysipelotrichaceae;Erysipelothrix  
Otu254 120 Bacteria;Bacteroidetes;Bacteroidia;Bacteroidales;Prevotellaceae;Prevotella  
Otu257 38 Bacteria;Bacteroidetes  
Otu256 69 Bacteria;Bacteroidetes;Bacteroidia;Bacteroidales;Porphyromonadaceae;Dysgonomonas  
Otu259 49 Bacteria;Bacteroidetes;Sphingobacteriia;Sphingobacteriales;Sphingobacteriaceae;Sphingobacterium  
Otu258 49 Bacteria;Bacteroidetes;Bacteroidia;Bacteroidales;Bacteroidaceae  
Otu709 7 Bacteria;Cyanobacteria;4C0d-2;YS2  
Otu708 5 Bacteria;Bacteroidetes;Bacteroidia;Bacteroidales  
Otu1139 4 Bacteria;Proteobacteria;Epsilonproteobacteria;Campylobacterales;Helicobacteraceae  
Otu1111 3 Bacteria;Firmicutes;Clostridia;Clostridiales  
Otu589 6 Bacteria;Firmicutes;AHT28  
Otu821 4 Bacteria;Firmicutes;Clostridia;Clostridiales  
Otu1034 4 Bacteria;Tenericutes;Mollicutes;RF39  
Otu989 2 Bacteria;Firmicutes;Clostridia;Clostridiales;Lachnospiraceae  
Otu396 54 Bacteria;Firmicutes;Clostridia;Clostridiales;Lachnospiraceae;Dorea

Otu827 2 Bacteria;Firmicutes;Clostridia;Clostridiales;Tissierellaceae;Tissierella\_Soehngenia  
Otu1109 4 Bacteria;Bacteroidetes;Bacteroidia;Bacteroidales;Prevotellaceae;Prevotella  
Otu1136 42 Bacteria;Firmicutes;Clostridia;Clostridiales;Ruminococcaceae  
Otu966 7 Bacteria;Firmicutes;Bacilli;Bacillales;Bacillaceae  
Otu29 1210 Bacteria  
Otu28 1073 Bacteria;Bacteroidetes;Flavobacteriia;Flavobacteriales;Weeksellaceae;Wautersiella  
Otu25 4152 Bacteria;Proteobacteria;Gammaproteobacteria;Pseudomonadales;Moraxellaceae;Acinetobacter  
Otu24 2687 Bacteria;Firmicutes;Clostridia;Clostridiales;Veillonellaceae;Megasphaera  
Otu27 1107 Bacteria;Fibrobacteres;Fibrobacteria;Fibrobacterales;Fibrobacteraceae;Fibrobacter;Fibrobacter\_succinogenes  
Otu26 988 Archaea;Euryarchaeota;Methanobacteria;Methanobacteriales;Methanobacteriaceae;Methanobrevibacter  
Otu21 1337 Bacteria;Firmicutes;Bacilli;Bacillales;Planococcaceae;Rummeliibacillus  
Otu20 2759 Bacteria;Bacteroidetes;Bacteroidia;Bacteroidales;S24-7  
Otu23 1771 Bacteria;Bacteroidetes  
Otu22 2028 Bacteria;Bacteroidetes;Bacteroidia;Bacteroidales;Marinilabiaceae  
Otu174 102 Bacteria;Tenericutes;Mollicutes;Acholeplasmatales;Acholeplasmataceae;Acholeplasma;Acholeplasma\_laidlawii  
Otu175 116 Bacteria;Firmicutes;Clostridia;Clostridiales;Ruminococcaceae;Oscillospira  
Otu176 78 Bacteria;Tenericutes;Mollicutes;Acholeplasmatales;Acholeplasmataceae;Acholeplasma  
Otu177 68 Bacteria;Bacteroidetes;Bacteroidia;Bacteroidales;Porphyromonadaceae;Dysgonomonas  
Otu170 113 Bacteria;Firmicutes;Clostridia;Clostridiales  
Otu171 80 Bacteria;Proteobacteria;Betaproteobacteria;Burkholderiales;Alcaligenaceae  
Otu172 136 Bacteria;Proteobacteria;Gammaproteobacteria;Enterobacteriales;Enterobacteriaceae;Escherichia;Escherichia\_coli  
Otu173 186 Bacteria;Bacteroidetes;Bacteroidia;Bacteroidales;Paraprevotellaceae  
Otu1110 11 Bacteria;Firmicutes;Clostridia;Clostridiales;Ruminococcaceae  
Otu178 217 Bacteria;Bacteroidetes;Bacteroidia;Bacteroidales;Prevotellaceae;Prevotella  
Otu179 147 Bacteria;Firmicutes;Clostridia;Clostridiales;Ruminococcaceae  
Otu518 12 Bacteria;Actinobacteria;Coriobacteriia;Coriobacteriales;Coriobacteriaceae

Otu1112 177 Bacteria;Proteobacteria;Betaproteobacteria;Burkholderiales;Comamonadaceae  
Otu991 2 Bacteria;Bacteroidetes;Bacteroidia;Bacteroidales;Prevotellaceae;Prevotella  
Otu898 10 Bacteria;Tenericutes;Mollicutes;Anaeroplasmatales;Anaeroplasmataceae;Anaeroplasma  
Otu908 3 Bacteria;Firmicutes;Clostridia;Clostridiales  
Otu789 4 Bacteria;Spirochaetes;Spirochaetes;Spirochaetales;Spirochaetaceae;Treponema  
Otu962 3 Bacteria;Firmicutes;Erysipelotrichi;Erysipelotrichales;Erysipelotrichaceae;p-75-a5  
Otu435 43 Bacteria;Firmicutes;Clostridia;Clostridiales;Ruminococcaceae  
Otu1084 2 Bacteria;Firmicutes;Clostridia;Clostridiales  
Otu788 529 Bacteria;Bacteroidetes;Bacteroidia;Bacteroidales;Porphyromonadaceae  
Otu1082 2 Bacteria;Proteobacteria;Gammaproteobacteria  
Otu1083 2 Bacteria;Verrucomicrobia;Verrucomicrobiae;Verrucomicrobiales;Verrucomicrobiaceae;Luteolibacter  
Otu1080 7 Bacteria;Bacteroidetes;Bacteroidia;Bacteroidales;Porphyromonadaceae;Dysgonomonas  
Otu434 27 Bacteria;Firmicutes;Erysipelotrichi;Erysipelotrichales;Erysipelotrichaceae;L7A\_E11  
Otu943 2 Bacteria;Firmicutes;Clostridia;Clostridiales;Ruminococcaceae  
Otu437 16 Bacteria;Firmicutes;Clostridia;Clostridiales;Ruminococcaceae  
Otu1088 2 Bacteria;Firmicutes;Bacilli  
Otu1031 19 Bacteria;Proteobacteria;Betaproteobacteria;Burkholderiales;Alcaligenaceae  
Otu875 4 Bacteria;Proteobacteria;Alphaproteobacteria;RF32  
Otu874 9 Bacteria;Actinobacteria;Actinobacteria;Actinomycetales;Microbacteriaceae  
Otu877 3 Bacteria;Firmicutes;Clostridia;Clostridiales;Lachnospiraceae;Blautia  
Otu436 36 Bacteria;Actinobacteria;Actinobacteria;Actinomycetales;Microbacteriaceae;Leucobacter  
Otu871 8 Bacteria;Tenericutes;Mollicutes;Acholeplasmatales;Acholeplasmataceae;Acholeplasma;Acholeplasma\_laidlawii  
Otu870 26 Bacteria;Firmicutes;Clostridia;Clostridiales;Lachnospiraceae;Blautia  
Otu873 15 Bacteria;Bacteroidetes;Bacteroidia;Bacteroidales;Bacteroidaceae;Bacteroides  
Otu872 17 Bacteria;Firmicutes;Clostridia;Clostridiales;Ruminococcaceae  
Otu1106 5 Bacteria;Bacteroidetes;Bacteroidia;Bacteroidales;Bacteroidaceae;Bacteroides;Bacteroides\_coprosuis



Otu431 2005 Bacteria;Bacteroidetes;Bacteroidia;Bacteroidales;Prevotellaceae;Prevotella  
Otu879 2 Bacteria;Firmicutes;Clostridia;Clostridiales;Ruminococcaceae;Oscillospira  
Otu878 2 Bacteria;Firmicutes;Clostridia;Clostridiales;Lachnospiraceae;Dorea  
Otu745 8 Bacteria;Firmicutes;Clostridia;Clostridiales;Tissierellaceae;GW-34  
Otu430 17 Bacteria;Cyanobacteria;4C0d-2;YS2  
Otu926 2 Bacteria  
Otu433 10 Bacteria;Bacteroidetes;Bacteroidia;Bacteroidales  
Otu707 11 Bacteria;Bacteroidetes;Bacteroidia;Bacteroidales;S24-7  
Otu432 39 Bacteria;Cyanobacteria;4C0d-2;YS2  
Otu781 12 Bacteria;Verrucomicrobia;Verruco-5;WCHB1-41;RFP12  
Otu268 59 Bacteria;Actinobacteria;Actinobacteria;Actinomycetales;Corynebacteriaceae;Corynebacterium  
Otu588 19 Bacteria;Firmicutes;Clostridia;Clostridiales;Tissierellaceae  
Otu780 24 Bacteria;Firmicutes;Erysipelotrichi;Erysipelotrichales;Erysipelotrichaceae;Erysipelothrix  
Otu1147 3 Bacteria;Firmicutes;Clostridia;Clostridiales  
Otu581 8 Bacteria;Firmicutes;Clostridia;Clostridiales;Lachnospiraceae;Coprococcus  
Otu580 14 Bacteria;Firmicutes;Clostridia;Clostridiales;Clostridiaceae;Clostridium  
Otu583 25 Bacteria;Firmicutes;Clostridia;Clostridiales;Lachnospiraceae  
Otu582 20 Bacteria;Firmicutes;Clostridia;Clostridiales;Lachnospiraceae  
Otu585 3 Bacteria;Proteobacteria;Gammaproteobacteria  
Otu584 13 Bacteria;Firmicutes  
Otu587 7 Bacteria;Bacteroidetes;Bacteroidia;Bacteroidales;Prevotellaceae  
Otu586 14 Bacteria;Firmicutes;Clostridia;Clostridiales;Clostridiaceae;Clostridium  
Otu656 12 Bacteria;Firmicutes;Clostridia;Clostridiales;Veillonellaceae;Megasphaera  
Otu1059 2 Bacteria;Tenericutes;Mollicutes;RF39  
Otu512 40 Bacteria;Firmicutes;Clostridia;Clostridiales  
Otu513 11 Bacteria;Firmicutes;Clostridia;Clostridiales

Otu459 24 Bacteria;Firmicutes;Clostridia;Clostridiales;Clostridiaceae;SMB53  
Otu458 997 Bacteria;Proteobacteria;Gammaproteobacteria;Aeromonadales;Succinivibrionaceae;Succinivibrio  
Otu516 14 Bacteria;Firmicutes;Clostridia;Clostridiales  
Otu517 136 Bacteria;Firmicutes;Clostridia;Clostridiales;Ruminococcaceae;Ruminococcus  
Otu514 13 Bacteria;Firmicutes;Clostridia;Clostridiales;Lachnospiraceae  
Otu515 15 Bacteria;Firmicutes;Clostridia;Clostridiales;Lachnospiraceae  
Otu453 27 Bacteria;Firmicutes;Clostridia;Clostridiales;Lachnospiraceae;Coprococcus;Coprococcus\_eutactus  
Otu452 50 Bacteria;Firmicutes;Clostridia;Clostridiales  
Otu451 23 Bacteria;Bacteroidetes;Bacteroidia;Bacteroidales;Marinilabiaceae;Ruminofilibacter;Ruminofilibacter\_xylanolyticum  
Otu450 20 Bacteria;Actinobacteria;Coriobacteriia;Coriobacteriales;Coriobacteriaceae  
Otu457 25 Bacteria;Bacteroidetes;Bacteroidia;Bacteroidales;Porphyromonadaceae;Dysgonomonas  
Otu456 87 Bacteria;Firmicutes;Clostridia;Clostridiales  
Otu455 28 Bacteria;Firmicutes;Clostridia;Clostridiales;Lachnospiraceae  
Otu454 22 Bacteria;Firmicutes;Clostridia;Clostridiales;Lachnospiraceae;Blautia  
Otu950 2 Bacteria;Cyanobacteria;4C0d-2;YS2  
Otu1079 2 Bacteria;Bacteroidetes;Bacteroidia;Bacteroidales;Prevotellaceae  
Otu1078 3 Bacteria;Proteobacteria;Gammaproteobacteria  
Otu397 28 Bacteria  
Otu1020 8 Bacteria;Actinobacteria;Actinobacteria;Actinomycetales;Corynebacteriaceae;Corynebacterium  
Otu1071 2 Bacteria;Bacteroidetes;Bacteroidia;Bacteroidales  
Otu1070 2 Bacteria;Bacteroidetes  
Otu1077 65 Bacteria;Firmicutes;Clostridia;Clostridiales;Tissierellaceae;Peptoniphilus  
Otu1058 12 Bacteria;Firmicutes;Clostridia;Clostridiales;Ruminococcaceae  
Otu1075 4 Bacteria;Tenericutes;Mollicutes;RF39  
Otu1021 7 Bacteria;Firmicutes;Clostridia;Clostridiales;Lachnospiraceae  
Otu228 182 Bacteria;Firmicutes;Clostridia;Clostridiales

Otu229 268 Bacteria;Firmicutes;Clostridia;Clostridiales;Ruminococcaceae  
Otu738 2 Bacteria;Firmicutes;Clostridia;Clostridiales;Ruminococcaceae  
Otu739 25 Bacteria;Bacteroidetes;Bacteroidia;Bacteroidales;Prevotellaceae;Prevotella  
Otu904 4 Bacteria;Firmicutes;Clostridia;Clostridiales;Christensenellaceae  
Otu884 2 Bacteria;Bacteroidetes;Bacteroidia;Bacteroidales;S24-7  
Otu220 20 Bacteria;Proteobacteria;Betaproteobacteria;Rhodocyclales;Rhodocyclaceae  
Otu221 78 Bacteria;Actinobacteria;Actinobacteria;Actinomycetales;Microbacteriaceae;Leucobacter  
Otu222 95 Bacteria;Proteobacteria;Deltaproteobacteria;Desulfovibrionales;Desulfovibrionaceae;Desulfovibrio;Desulfovibrio\_D168  
Otu223 165 Bacteria;Proteobacteria;Gammaproteobacteria  
Otu224 91 Bacteria;Firmicutes;Clostridia;Clostridiales;Ruminococcaceae;Ruminococcus  
Otu225 82 Bacteria;Bacteroidetes;Bacteroidia;Bacteroidales;Bacteroidaceae;Bacteroides;Bacteroides\_coprosuis  
Otu226 49 Bacteria;Firmicutes;Clostridia;Clostridiales;Mogibacteriaceae  
Otu227 58 Bacteria;Firmicutes;Erysipelotrichi;Erysipelotrichales;Erysipelotrichaceae  
Otu1143 58 Bacteria;Bacteroidetes;Bacteroidia;Bacteroidales;Prevotellaceae;Prevotella;Prevotella\_copri  
Otu511 12 Bacteria;Proteobacteria;Gammaproteobacteria  
Otu927 2 Bacteria;Firmicutes;Clostridia;Clostridiales  
Otu1141 6 Bacteria;Firmicutes;Erysipelotrichi;Erysipelotrichales;Erysipelotrichaceae  
Otu938 67 Bacteria;Bacteroidetes;Bacteroidia;Bacteroidales;Porphyromonadaceae  
Otu907 2 Bacteria;Deferribacteres;Deferribacteres;Deferribacterales;Deferribacteraceae;Geovibrio;Geovibrio\_thiophilus  
Otu1140 7 Bacteria;Tenericutes;Mollicutes;RF39  
Otu980 2 Bacteria;Firmicutes;Clostridia;Clostridiales;Clostridiaceae;Clostridium  
Otu965 2 Bacteria;Bacteroidetes;Bacteroidia;Bacteroidales  
Otu939 2 Bacteria;Firmicutes;Clostridia  
Otu1028 2 Bacteria;Bacteroidetes;Bacteroidia;Bacteroidales;Prevotellaceae;Prevotella  
Otu1131 2 Bacteria;Firmicutes;Clostridia;Clostridiales;Ruminococcaceae  
Otu1029 5 Bacteria;Proteobacteria;Gammaproteobacteria;Enterobacteriales;Enterobacteriaceae

Otu1107 6 Bacteria;Firmicutes;Clostridia;Clostridiales;Lachnospiraceae;Ruminococcus;Ruminococcus\_torques  
Otu942 2 Bacteria;Tenericutes;Mollicutes;Acholeplasmatales;Acholeplasmataceae;Acholeplasma  
Otu1105 17 Bacteria;Firmicutes;Clostridia;Clostridiales;Lachnospiraceae  
Otu1104 2 Bacteria;Tenericutes;Mollicutes;RF39  
Otu358 54 Bacteria;Bacteroidetes;Flavobacteriia;Flavobacteriales;Weeksellaceae  
Otu359 15 Bacteria;Firmicutes;Clostridia;Clostridiales;Lachnospiraceae  
Otu428 9 Bacteria;Cyanobacteria;4C0d-2;YS2  
Otu429 235 Bacteria;Bacteroidetes;Sphingobacteriia;Sphingobacteriales;Sphingobacteriaceae  
Otu354 27 Bacteria;Tenericutes;Mollicutes;RF39  
Otu355 32 Bacteria;Bacteroidetes;Bacteroidia;Bacteroidales  
Otu356 93 Bacteria;Proteobacteria;Gammaproteobacteria;Alteromonadales;Alteromonadaceae;Candidatus\_Endobugula  
Otu357 29 Bacteria;Bacteroidetes;Bacteroidia;Bacteroidales;S24-7  
Otu350 61 Bacteria;Bacteroidetes;Bacteroidia;Bacteroidales;Prevotellaceae;Prevotella  
Otu351 29 Bacteria;Firmicutes;Erysipelotrichi;Erysipelotrichales;Erysipelotrichaceae  
Otu352 27 Bacteria;Tenericutes;Mollicutes;RF39  
Otu353 26 Bacteria;Firmicutes;Clostridia;Clostridiales;Ruminococcaceae  
Otu646 3 Bacteria;Firmicutes;Clostridia;Clostridiales;Ruminococcaceae  
Otu647 69 Bacteria;Bacteroidetes;Flavobacteriia;Flavobacteriales;Flavobacteriaceae  
Otu644 9 Bacteria;Bacteroidetes;Bacteroidia;Bacteroidales;Porphyromonadaceae  
Otu519 12 Bacteria;Cyanobacteria;4C0d-2;YS2  
Otu642 7 Bacteria;Bacteroidetes;Bacteroidia;Bacteroidales;S24-7  
Otu643 3 Bacteria  
Otu129 161 Bacteria;Bacteroidetes;Bacteroidia;Bacteroidales;Bacteroidaceae;Bacteroides  
Otu128 325 Bacteria;Firmicutes;Bacilli;Bacillales;Planococcaceae  
Otu127 87 Bacteria;Bacteroidetes;Flavobacteriia;Flavobacteriales;Flavobacteriaceae  
Otu126 168 Bacteria;Bacteroidetes;Bacteroidia;Bacteroidales;Prevotellaceae;Prevotella

Otu125 352 Bacteria;Bacteroidetes;Bacteroidia;Bacteroidales;Porphyromonadaceae  
Otu124 171 Bacteria;Bacteroidetes;Bacteroidia;Bacteroidales;S24-7  
Otu123 157 Bacteria;Proteobacteria;Deltaproteobacteria;Bdellovibrionales;Bacteriovoraceae  
Otu122 203 Bacteria;Firmicutes;Clostridia;Clostridiales;Ruminococcaceae  
Otu121 179 Bacteria;Proteobacteria;Gammaproteobacteria  
Otu120 298 Bacteria;Bacteroidetes;Bacteroidia;Bacteroidales;RF16  
Otu61 1945 Bacteria;Bacteroidetes;Bacteroidia;Bacteroidales;Prevotellaceae;Prevotella;Prevotella\_copri  
Otu60 393 Bacteria;Firmicutes;Clostridia;Clostridiales;Veillonellaceae;Succiniclaticum  
Otu63 742 Bacteria;Bacteroidetes;Bacteroidia;Bacteroidales  
Otu62 561 Bacteria;Bacteroidetes;Bacteroidia;Bacteroidales  
Otu65 843 Bacteria;Proteobacteria;Betaproteobacteria;Burkholderiales;Alcaligenaceae  
Otu64 695 Bacteria;Proteobacteria;Betaproteobacteria;Burkholderiales;Alcaligenaceae;Alcaligenes;Alcaligenes\_faecalis  
Otu67 653 Bacteria;Bacteroidetes;Bacteroidia;Bacteroidales;Prevotellaceae;Prevotella;Prevotella\_stercorea  
Otu66 801 Bacteria;Bacteroidetes;Flavobacteriia;Flavobacteriales;Weeksellaceae  
Otu69 414 Bacteria;Proteobacteria;Betaproteobacteria;Burkholderiales;Alcaligenaceae  
Otu68 528 Bacteria;Firmicutes;Clostridia;Clostridiales;Tissierellaceae;GW-34  
Otu747 34 Bacteria;Bacteroidetes;Bacteroidia;Bacteroidales;Paraprevotellaceae;Prevotella  
Otu906 3 Bacteria;Firmicutes  
Otu901 4 Bacteria;Firmicutes;Clostridia;Clostridiales;Lachnospiraceae  
Otu900 12 Bacteria;Bacteroidetes;Bacteroidia;Bacteroidales;Prevotellaceae;Prevotella  
Otu903 2 Bacteria;Firmicutes;Clostridia;Clostridiales  
Otu902 7 Bacteria;Firmicutes;Clostridia;Clostridiales;Ruminococcaceae;Oscillospira  
Otu933 2 Bacteria;Actinobacteria;Actinobacteria;Actinomycetales;Mycobacteriaceae;Mycobacterium  
Otu947 2 Bacteria;Firmicutes;Clostridia;Clostridiales;Mogibacteriaceae;Mogibacterium  
Otu1161 5 Bacteria;Firmicutes;Clostridia;Clostridiales;Lachnospiraceae  
Otu946 4 Bacteria;Firmicutes;Clostridia;Clostridiales;Lachnospiraceae

Otu633 10 Bacteria;Firmicutes;Erysipelotrichi;Erysipelotrichales;Erysipelotrichaceae;Catenibacterium  
Otu632 57 Bacteria;Bacteroidetes;Bacteroidia;Bacteroidales;Prevotellaceae;Prevotella;Prevotella\_copri  
Otu631 3 Bacteria;Bacteroidetes;Bacteroidia;Bacteroidales  
Otu630 5 Bacteria;Firmicutes;Clostridia;Clostridiales;Ruminococcaceae  
Otu637 9 Bacteria;Firmicutes;Clostridia;Clostridiales;Ruminococcaceae;Ruminococcus  
Otu636 13 Bacteria;Firmicutes;Clostridia;Clostridiales;Ruminococcaceae  
Otu635 18 Bacteria;Verrucomicrobia;Opitutae  
Otu634 133 Bacteria;Bacteroidetes;Bacteroidia;Bacteroidales;Prevotellaceae;Prevotella;Prevotella\_copri  
Otu639 7 Bacteria;Firmicutes;Clostridia;Clostridiales;Lachnospiraceae;Coprococcus  
Otu638 17 Bacteria;Tenericutes;Mollicutes;RF39  
Otu1146 6 Bacteria;Firmicutes;Clostridia;Clostridiales;Ruminococcaceae;Oscillospira  
Otu769 10 Bacteria;Synergistetes;Synergistia;Synergistales;Dethiosulfovibrionaceae  
Otu1040 12 Bacteria;Firmicutes;Clostridia;Clostridiales;Ruminococcaceae  
Otu768 2 Bacteria;Firmicutes;Clostridia;Clostridiales  
Otu791 3 Bacteria;Firmicutes;Clostridia;Clostridiales  
Otu1041 337 Bacteria;Bacteroidetes;Bacteroidia;Bacteroidales;Porphyromonadaceae  
Otu1072 2 Bacteria;Firmicutes;Clostridia;Clostridiales  
Otu839 8 Bacteria;Proteobacteria;Alphaproteobacteria;RF32  
Otu838 2 Bacteria;Firmicutes;Clostridia;Clostridiales;Ruminococcaceae;Ruminococcus  
Otu831 8 Bacteria;Firmicutes;Clostridia;Clostridiales;Lachnospiraceae;Dorea  
Otu830 3 Bacteria;Bacteroidetes;Bacteroidia;Bacteroidales;Porphyromonadaceae  
Otu833 2 Bacteria;Firmicutes;Erysipelotrichi;Erysipelotrichales;Erysipelotrichaceae;p-75-a5  
Otu832 9 Bacteria;Firmicutes;Clostridia;Clostridiales;Ruminococcaceae  
Otu835 13 Bacteria;Cyanobacteria;4C0d-2;YS2  
Otu834 3 Bacteria;Firmicutes;Clostridia;Clostridiales;Tissierellaceae  
Otu837 2 Bacteria;Firmicutes;Clostridia;Clostridiales;Lachnospiraceae

Otu836 3 Bacteria;Bacteroidetes;Bacteroidia;Bacteroidales;Prevotellaceae;Prevotella  
Otu923 460 Bacteria  
Otu967 11 Bacteria;Firmicutes;Clostridia;Clostridiales;Lachnospiraceae  
Otu1074 2 Bacteria;Bacteroidetes;Bacteroidia;Bacteroidales;Prevotellaceae  
Otu1048 21 Bacteria;Firmicutes;Clostridia;Clostridiales;Lachnospiraceae  
Otu1049 30 Bacteria;Firmicutes;Clostridia;Clostridiales;Lachnospiraceae  
Otu496 36 Bacteria;Tenericutes;Mollicutes;RF39  
Otu945 2 Bacteria;Firmicutes;Clostridia;Clostridiales;Lachnospiraceae  
Otu885 2 Bacteria;Firmicutes;Clostridia;Clostridiales;Ruminococcaceae;Oscillospira  
Otu1085 3 Bacteria;Firmicutes;Clostridia;Clostridiales  
Otu922 32 Bacteria;Firmicutes;Clostridia;Clostridiales;Lachnospiraceae  
Otu495 16 Bacteria;Actinobacteria;Actinobacteria;Actinomycetales  
Otu921 6 Bacteria;Firmicutes;Clostridia;Clostridiales  
Otu732 5 Bacteria  
Otu733 2 Bacteria;Bacteroidetes  
Otu730 56 Bacteria;Bacteroidetes;Bacteroidia;Bacteroidales;Bacteroidaceae;Bacteroides;Bacteroides\_coprosuis  
Otu1134 14 Bacteria;Bacteroidetes;Sphingobacteriia;Sphingobacteriales;Sphingobacteriaceae;Sphingobacterium  
Otu1099 12 Bacteria;Tenericutes;Mollicutes;RF39  
Otu731 2 Bacteria;Bacteroidetes;Bacteroidia;Bacteroidales;Prevotellaceae;Prevotella  
Otu887 5 Bacteria;Firmicutes;Clostridia;Clostridiales  
Otu1098 2 Bacteria;Firmicutes;Clostridia;Clostridiales;Ruminococcaceae;Oscillospira  
Otu736 2 Bacteria;Firmicutes;Clostridia;Clostridiales;Tissierellaceae;Sporanaerobacter  
Otu721 8 Bacteria;Firmicutes;Clostridia;Clostridiales  
Otu1116 71 Bacteria;Firmicutes;Clostridia;Clostridiales;Ruminococcaceae;Ruminococcus  
Otu751 10 Bacteria;Bacteroidetes;Bacteroidia;Bacteroidales;Prevotellaceae;Prevotella  
Otu737 16 Bacteria;Firmicutes;Clostridia;Clostridiales;Ruminococcaceae

Otu1030 2 Bacteria;Firmicutes  
Otu1117 3 Bacteria;Firmicutes;Clostridia;Clostridiales;Lachnospiraceae  
Otu734 3 Bacteria;Firmicutes;Clostridia;Clostridiales;Tissierellaceae;Sedimentibacter  
Otu988 8 Bacteria;Firmicutes;Clostridia;Clostridiales;Ruminococcaceae;Oscillospira  
Otu735 7 Bacteria;Firmicutes;Clostridia;Clostridiales;Veillonellaceae  
Otu1159 2 Bacteria;Firmicutes;Bacilli;Lactobacillales;Lactobacillaceae;Lactobacillus  
Otu462 16 Bacteria;Firmicutes;Clostridia;Clostridiales;Ruminococcaceae  
Otu463 13 Bacteria;Firmicutes;Clostridia;MBA08  
Otu460 13 Bacteria;Thermi;Deinococci;Deinococcales;Trueperaceae;B-42  
Otu461 15 Bacteria;Bacteroidetes;Flavobacteriia;Flavobacteriales;Flavobacteriaceae  
Otu466 17 Bacteria;Firmicutes;Clostridia;Clostridiales;Tissierellaceae;Gallicola  
Otu467 682 Bacteria;Bacteroidetes;Bacteroidia;Bacteroidales;Bacteroidaceae;Bacteroides;Bacteroides\_coprosuis  
Otu464 12 Bacteria;Firmicutes;Clostridia;Clostridiales;Lachnospiraceae;Coprococcus  
Otu465 9 Bacteria;Tenericutes;Mollicutes;RF39  
Otu783 9 Bacteria;Firmicutes;Clostridia;Clostridiales  
Otu782 15 Bacteria;Firmicutes;Erysipelotrichi;Erysipelotrichales;Erysipelotrichaceae;p-75-a5  
Otu468 13 Bacteria;Bacteroidetes;Bacteroidia;Bacteroidales;Porphyromonadaceae;Parabacteroides  
Otu469 28 Bacteria;Firmicutes;Clostridia;Clostridiales;Ruminococcaceae  
Otu787 2 Bacteria;Bacteroidetes;Bacteroidia;Bacteroidales;Prevotellaceae  
Otu786 2 Bacteria;Bacteroidetes;Bacteroidia;Bacteroidales;Prevotellaceae;Prevotella  
Otu785 3 Bacteria;Bacteroidetes  
Otu784 111 Bacteria;Bacteroidetes;Bacteroidia;Bacteroidales;Prevotellaceae;Prevotella;Prevotella\_copri  
Otu1024 4 Bacteria;Firmicutes;Erysipelotrichi;Erysipelotrichales;Erysipelotrichaceae;Erysipelothrix  
Otu1025 3 Bacteria;Actinobacteria;Actinobacteria;Actinomycetales  
Otu1026 8 Bacteria;Firmicutes;Clostridia;Clostridiales;Lachnospiraceae  
Otu1027 20 Bacteria;Bacteroidetes;Bacteroidia;Bacteroidales;Prevotellaceae;Prevotella



Otu549 15 Bacteria;Bacteroidetes;Sphingobacteriia;Sphingobacteriales;Sphingobacteriaceae  
Otu548 14 Bacteria;Proteobacteria;Deltaproteobacteria;GMD14H09  
Otu1022 4 Bacteria  
Otu1023 7 Bacteria;Firmicutes;Clostridia;Clostridiales;Lachnospiraceae  
Otu545 20 Bacteria;Verrucomicrobia;Verrucomicrobiae;Verrucomicrobiales;Verrucomicrobiaceae;Akkermansia  
Otu544 80 Bacteria;Proteobacteria;Alphaproteobacteria;Rhodobacterales;Rhodobacteraceae  
Otu547 17 Bacteria;Firmicutes;Clostridia;Clostridiales;Lachnospiraceae;Coprococcus;Coprococcus\_catus  
Otu546 21 Bacteria;Verrucomicrobia;Verrucomicrobiae;Verrucomicrobiales;Verrucomicrobiaceae;Akkermansia;Akkermansia\_muciniphila  
Otu541 30 Bacteria;Tenericutes;Mollicutes;RF39  
Otu540 20 Bacteria;Firmicutes;Clostridia;Clostridiales;Lachnospiraceae  
Otu543 13 Bacteria;Firmicutes;Erysipelotrichi;Erysipelotrichales;Erysipelotrichaceae  
Otu542 18 Bacteria;Firmicutes;Clostridia;Clostridiales;Tissierellaceae;Tissierella\_Soehngenia  
Otu765 2 Bacteria;Firmicutes;Clostridia;Clostridiales  
Otu764 13 Bacteria;Firmicutes;Clostridia;Clostridiales  
Otu608 3 Bacteria;Firmicutes;Clostridia;Clostridiales  
Otu609 25 Bacteria;Firmicutes;Clostridia;Clostridiales;Peptostreptococcaceae  
Otu761 3 Bacteria;Firmicutes;Clostridia;Clostridiales;Ruminococcaceae;Ruminococcus  
Otu760 2 Bacteria;Firmicutes  
Otu763 10 Bacteria;Firmicutes;Clostridia;Clostridiales;Lachnospiraceae  
Otu762 176 Bacteria;Bacteroidetes;Bacteroidia;Bacteroidales  
Otu602 11 Bacteria;Verrucomicrobia;Verruco-5;WCHB1-41;RFP12  
Otu603 35 Bacteria;Bacteroidetes;Bacteroidia;Bacteroidales;Prevotellaceae;Prevotella  
Otu600 10 Bacteria;Proteobacteria;Gammaproteobacteria  
Otu601 13 Bacteria;Firmicutes;Clostridia;Clostridiales;Mogibacteriaceae;Anaerovorax  
Otu606 5 Bacteria;Proteobacteria;Deltaproteobacteria;Desulfovibrionales;Desulfovibrionaceae  
Otu607 11 Bacteria;Bacteroidetes;Bacteroidia;Bacteroidales;S24-7

Otu604 86 Bacteria;Firmicutes;Clostridia;Clostridiales;Ruminococcaceae  
Otu605 3 Bacteria;Firmicutes;Erysipelotrichi;Erysipelotrichales;Erysipelotrichaceae;RFN20  
Otu1157 85 Bacteria;Firmicutes;Clostridia;Clostridiales;Tissierellaceae  
Otu1097 4 Bacteria;Actinobacteria;Actinobacteria;Bifidobacteriales;Bifidobacteriaceae  
Otu1096 10 Bacteria;Proteobacteria;Gammaproteobacteria;Pseudomonadales;Moraxellaceae;Acinetobacter  
Otu611 6 Bacteria;Bacteroidetes;Bacteroidia;Bacteroidales;Porphyromonadaceae;Parabacteroides  
Otu1130 5 Bacteria;Firmicutes;Clostridia;Clostridiales  
Otu307 73 Bacteria;Bacteroidetes;Bacteroidia;Bacteroidales;Paraprevotellaceae;CF231  
Otu306 54 Bacteria;Firmicutes;Clostridia;Clostridiales;Christensenellaceae  
Otu305 49 Bacteria;Bacteroidetes;Bacteroidia;Bacteroidales  
Otu304 49 Bacteria;Firmicutes;Clostridia;Clostridiales  
Otu303 32 Bacteria;Firmicutes;Clostridia;Clostridiales;Ruminococcaceae  
Otu269 24 Bacteria;Firmicutes;Clostridia;Clostridiales;Ruminococcaceae  
Otu301 61 Bacteria;Firmicutes;Clostridia;Clostridiales;Clostridiaceae;Proteiniclasticum  
Otu300 44 Bacteria;Firmicutes;Clostridia;Clostridiales;Ruminococcaceae;Ruminococcus  
Otu264 56 Bacteria;Firmicutes;Erysipelotrichi;Erysipelotrichales;Erysipelotrichaceae;Erysipelothrix  
Otu265 125 Bacteria;Firmicutes;Bacilli;Lactobacillales;Streptococcaceae;Streptococcus  
Otu266 92 Bacteria;Bacteroidetes;Bacteroidia;Bacteroidales;Bacteroidaceae;Bacteroides;Bacteroides\_coprosuis  
Otu267 58 Bacteria;Proteobacteria;Deltaproteobacteria;Desulfovibrionales;Desulfovibrionaceae;Desulfovibrio  
Otu260 54 Bacteria;Firmicutes;Clostridia;Clostridiales;Clostridiaceae;Clostridium  
Otu261 52 Bacteria;Cyanobacteria;4C0d-2;YS2  
Otu262 96 Bacteria;Firmicutes;Bacilli;Lactobacillales;Enterococcaceae;Enterococcus  
Otu308 39 Bacteria;Tenericutes;Mollicutes;RF39  
Otu116 238 Bacteria;Bacteroidetes;Sphingobacteriia;Sphingobacteriales;Sphingobacteriaceae  
Otu117 148 Bacteria;Firmicutes;Bacilli;Lactobacillales;Lactobacillaceae;Lactobacillus  
Otu114 283 Bacteria;Bacteroidetes;Bacteroidia;Bacteroidales;Paraprevotellaceae

Otu115 232 Bacteria;Bacteroidetes;Cytophagia;Cytophagales;Cyclobacteriaceae  
Otu112 167 Bacteria;Proteobacteria;Deltaproteobacteria;Bdellovibrionales;Bacteriovoraceae  
Otu113 488 Bacteria;Bacteroidetes;Bacteroidia;Bacteroidales;Porphyromonadaceae;Parabacteroides  
Otu110 548 Bacteria;Bacteroidetes;Bacteroidia;Bacteroidales;Porphyromonadaceae  
Otu111 153 Bacteria;Proteobacteria;Alphaproteobacteria;Rhizobiales;Brucellaceae  
Otu118 183 Bacteria;Tenericutes;Mollicutes;Acholeplasmatales;Acholeplasmataceae  
Otu119 149 Bacteria;Bacteroidetes;Bacteroidia;Bacteroidales;Bacteroidaceae;Bacteroides;Bacteroides\_coprosuis  
Otu286 52 Bacteria;Spirochaetes;Spirochaetes;Spirochaetales;Spirochaetaceae;Treponema  
Otu287 39 Bacteria;Bacteroidetes;Flavobacteriia;Flavobacteriales;Flavobacteriaceae  
Otu284 29 Bacteria;Firmicutes;Bacilli;Bacillales  
Otu285 30 Bacteria;Bacteroidetes;Bacteroidia;Bacteroidales;p-2534-18B5  
Otu282 61 Bacteria;Bacteroidetes;Sphingobacteriia;Sphingobacteriales;Sphingobacteriaceae  
Otu283 66 Bacteria;Bacteroidetes;Bacteroidia;Bacteroidales;Prevotellaceae;Prevotella  
Otu280 110 Bacteria;Firmicutes;Clostridia;Clostridiales  
Otu281 69 Bacteria;Firmicutes;Erysipelotrichi;Erysipelotrichales;Erysipelotrichaceae;p-75-a5  
Otu288 53 Bacteria;Firmicutes;Clostridia;Clostridiales;Ruminococcaceae  
Otu289 38 Bacteria;Firmicutes;Bacilli;Lactobacillales;Aerococcaceae;Facklamia  
Otu720 3 Bacteria;Bacteroidetes;Bacteroidia;Bacteroidales;Prevotellaceae  
Otu756 5 Bacteria;Proteobacteria;Betaproteobacteria;Burkholderiales;Comamonadaceae;Limnohabitans  
Otu990 7 Bacteria;Firmicutes;Clostridia;Clostridiales;Ruminococcaceae  
Otu38 1204 Bacteria;Proteobacteria  
Otu39 872 Bacteria;Proteobacteria;Gammaproteobacteria;Xanthomonadales;Xanthomonadaceae;Wohlfahrtiimonas  
Otu36 2237 Bacteria;Proteobacteria;Gammaproteobacteria;Oceanospirillales;Halomonadaceae  
Otu37 1043 Bacteria;Proteobacteria;Gammaproteobacteria;Alteromonadales;Idiomarinaceae;Pseudidiomarina  
Otu34 1279 Bacteria;Firmicutes;Clostridia;Clostridiales;Lachnospiraceae;Roseburia  
Otu35 2016 Bacteria;Firmicutes;Clostridia;Clostridiales;Veillonellaceae;Phascolarctobacterium

|         |      |                                                                                                         |
|---------|------|---------------------------------------------------------------------------------------------------------|
| Otu32   | 1200 | Bacteria;Bacteroidetes;Bacteroidia;Bacteroidales;Prevotellaceae;Prevotella                              |
| Otu33   | 2141 | Bacteria;Bacteroidetes;Bacteroidia;Bacteroidales;Prevotellaceae;Prevotella                              |
| Otu30   | 997  | Bacteria;Proteobacteria;Deltaproteobacteria;Desulfovibrionales;Desulfovibrionaceae;Desulfovibrio        |
| Otu31   | 1497 | Bacteria;Bacteroidetes;Bacteroidia;Bacteroidales                                                        |
| Otu163  | 243  | Bacteria;Bacteroidetes;Bacteroidia;Bacteroidales                                                        |
| Otu162  | 157  | Bacteria;Bacteroidetes;Flavobacteriia;Flavobacteriales;Weeksellaceae;Wautersiella                       |
| Otu161  | 447  | Bacteria;Firmicutes;Clostridia;Clostridiales;Ruminococcaceae                                            |
| Otu160  | 95   | Bacteria;Bacteroidetes;Flavobacteriia;Flavobacteriales;Flavobacteriaceae;Myroides;Myroides_odoratimimus |
| Otu167  | 121  | Bacteria;Firmicutes;Clostridia;Clostridiales;Clostridiaceae                                             |
| Otu309  | 150  | Bacteria;Firmicutes;Clostridia;Clostridiales                                                            |
| Otu165  | 115  | Bacteria;Proteobacteria;Gammaproteobacteria;Alteromonadales;HTCC2188;HTCC                               |
| Otu164  | 244  | Bacteria;Proteobacteria;Gammaproteobacteria;Xanthomonadales;Xanthomonadaceae;Stenotrophomonas           |
| Otu169  | 88   | Bacteria;Bacteroidetes;Flavobacteriia;Flavobacteriales;Cryomorphaceae;Brumimicrobium                    |
| Otu263  | 45   | Bacteria;Firmicutes;Clostridia;Clostridiales                                                            |
| Otu1062 | 13   | Bacteria;Bacteroidetes;Bacteroidia;Bacteroidales;Porphyromonadaceae                                     |
| Otu801  | 4    | Bacteria;Tenericutes;Mollicutes;RF39                                                                    |
| Otu1160 | 4    | Bacteria;Bacteroidetes;Bacteroidia;Bacteroidales                                                        |
| Otu1145 | 3    | Bacteria;Firmicutes;Clostridia;Clostridiales;Ruminococcaceae                                            |
| Otu1129 | 2    | Bacteria;Firmicutes;Clostridia;Clostridiales                                                            |
| Otu998  | 2    | Bacteria                                                                                                |
| Otu615  | 10   | Bacteria;Firmicutes;Clostridia;Clostridiales;Lachnospiraceae;Blautia                                    |
| Otu999  | 5    | Bacteria;Firmicutes;Clostridia;Clostridiales;Ruminococcaceae                                            |
| Otu929  | 235  | Bacteria;Firmicutes;Clostridia;Clostridiales;Ruminococcaceae                                            |
| Otu758  | 19   | Bacteria;Bacteroidetes;Bacteroidia;Bacteroidales;Prevotellaceae;Prevotella                              |
| Otu841  | 9    | Bacteria;Tenericutes;RF3;ML615J-28                                                                      |
| Otu842  | 23   | Bacteria;Bacteroidetes;Bacteroidia;Bacteroidales;Prevotellaceae;Prevotella                              |

Otu843 9 Bacteria;Firmicutes  
Otu844 2 Bacteria;Bacteroidetes;Sphingobacteriia;Sphingobacteriales;Sphingobacteriaceae;Sphingobacterium  
Otu845 70 Bacteria;Firmicutes;Clostridia  
Otu846 8 Bacteria;Firmicutes;Clostridia;Clostridiales  
Otu847 3 Bacteria;Firmicutes;Erysipelotrichi;Erysipelotrichales;Erysipelotrichaceae  
Otu848 4 Bacteria;Firmicutes;Clostridia;Clostridiales  
Otu849 2 Bacteria;Bacteroidetes  
Otu83 461 Bacteria;Firmicutes;Clostridia;Clostridiales;Ruminococcaceae;Ruminococcus;Ruminococcus\_bromii  
Otu82 623 Bacteria;Proteobacteria;Gammaproteobacteria;Pseudomonadales;Pseudomonadaceae  
Otu81 229 Bacteria;Firmicutes;Clostridia;Clostridiales;Lachnospiraceae;Coprococcus  
Otu80 505 Bacteria;Proteobacteria;Gammaproteobacteria;Pseudomonadales;Pseudomonadaceae  
Otu87 220 Bacteria;Proteobacteria;Epsilonproteobacteria;Campylobacteriales;Campylobacteraceae;Campylobacter  
Otu86 113 Bacteria;Spirochaetes;Spirochaetes;Spirochaetales;Spirochaetaceae;Treponema  
Otu85 225 Bacteria;Bacteroidetes;Saprosirae;Saprosirales;Chitinophagaceae  
Otu84 439 Bacteria;Bacteroidetes;Bacteroidia;Bacteroidales;Paraprevotellaceae;Prevotella  
Otu1103 2 Bacteria;Proteobacteria;Alphaproteobacteria;Rhizobiales;Phyllobacteriaceae  
Otu89 520 Bacteria;Bacteroidetes;Bacteroidia;Bacteroidales;Prevotellaceae;Prevotella  
Otu88 190 Bacteria;Proteobacteria;Alphaproteobacteria;Caulobacteriales;Caulobacteraceae;Brevundimonas;Brevundimonas\_diminuta  
Otu928 6 Bacteria;Proteobacteria;Gammaproteobacteria;Xanthomonadales;Xanthomonadaceae;Luteimonas  
Otu759 8 Bacteria;Firmicutes;Clostridia;Clostridiales;Lachnospiraceae;Epulopiscium  
Otu1102 2 Bacteria;Cyanobacteria;4C0d-2;YS2  
Otu1101 2 Bacteria;Firmicutes;Clostridia;Clostridiales  
Otu1149 2 Bacteria;Actinobacteria;Actinobacteria;Actinomycetales;Corynebacteriaceae;Corynebacterium  
Otu1100 8 Bacteria;Firmicutes;Clostridia;Clostridiales;Lachnospiraceae;Blautia;Blautia\_obeum  
Otu1128 3 Bacteria;Firmicutes;Clostridia;Clostridiales;Ruminococcaceae  
Otu1011 20 Bacteria;Bacteroidetes;Bacteroidia;Bacteroidales;Porphyromonadaceae;Dysgonomonas

Otu426 31 Bacteria;Bacteroidetes;Bacteroidia;Bacteroidales;S24-7  
Otu617 209 Bacteria;Bacteroidetes;Bacteroidia;Bacteroidales;Prevotellaceae;Prevotella;Prevotella\_stercorea  
Otu427 59 Bacteria;Bacteroidetes;Bacteroidia;Bacteroidales;Prevotellaceae;Prevotella  
Otu798 9 Bacteria;Firmicutes;Clostridia;Clostridiales;Dehalobacteriaceae;Dehalobacterium  
Otu976 4 Bacteria;Firmicutes;Clostridia;Clostridiales;Ruminococcaceae  
Otu424 27 Bacteria;Firmicutes;Clostridia;Clostridiales;Lachnospiraceae;Coprococcus  
Otu799 8 Bacteria;Verrucomicrobia;Verruco-5;WCHB1-41;RFP12  
Otu501 61 Bacteria;Firmicutes;Clostridia;Clostridiales;Lachnospiraceae  
Otu500 14 Bacteria;Firmicutes;Clostridia;Clostridiales;Ruminococcaceae;Oscillospira  
Otu503 22 Bacteria;Bacteroidetes;Bacteroidia;Bacteroidales  
Otu425 20 Bacteria;Actinobacteria;Coriobacteriia;Coriobacteriales;Coriobacteriaceae  
Otu505 21 Bacteria;Tenericutes;Mollicutes;Acholeplasmatales;Acholeplasmataceae;Acholeplasma  
Otu504 10 Bacteria;Firmicutes;Erysipelotrichi;Erysipelotrichales;Erysipelotrichaceae  
Otu507 6 Bacteria;Firmicutes;Clostridia;Clostridiales  
Otu506 12 Bacteria;Firmicutes;Clostridia;Clostridiales;Ruminococcaceae  
Otu509 11 Bacteria;Actinobacteria;Coriobacteriia;Coriobacteriales;Coriobacteriaceae  
Otu422 11 Bacteria;Bacteroidetes;Flavobacteriia;Flavobacteriales;Flavobacteriaceae;Myroides  
Otu1010 12 Bacteria;Firmicutes;Clostridia;Clostridiales;Lachnospiraceae;Coprococcus  
Otu423 10 Bacteria;Firmicutes;Clostridia;Clostridiales;Lachnospiraceae  
Otu1068 5 Bacteria;Bacteroidetes;Flavobacteriia;Flavobacteriales;Weeksellaceae;Chryseobacterium  
Otu1069 11 Bacteria;Proteobacteria;Gammaproteobacteria  
Otu420 18 Bacteria;Verrucomicrobia;Verruco-5;WCHB1-41;RFP12  
Otu1060 2 Bacteria;Bacteroidetes  
Otu1061 2 Bacteria;Bacteroidetes;Bacteroidia;Bacteroidales;Porphyromonadaceae;Dysgonomonas  
Otu977 7 Bacteria;Bacteroidetes;Bacteroidia;Bacteroidales;S24-7  
Otu421 35 Bacteria;Bacteroidetes;Bacteroidia;Bacteroidales;Paraprevotellaceae;Prevotella

Otu1064 33 Bacteria;Bacteroidetes;Bacteroidia;Bacteroidales;Prevotellaceae;Prevotella;Prevotella\_copri  
Otu1065 2 Bacteria;Proteobacteria;Gammaproteobacteria;Alteromonadales;Alteromonadaceae;Cellvibrio  
Otu1066 2 Bacteria;Firmicutes;Clostridia;Clostridiales;Ruminococcaceae  
Otu1067 2 Bacteria;Tenericutes;Mollicutes;RF39  
Otu480 44 Bacteria;Firmicutes;Clostridia;Clostridiales;Ruminococcaceae  
Otu481 16 Bacteria;Firmicutes;Clostridia;Clostridiales;Lachnospiraceae;Lachnospira  
Otu482 53 Bacteria;Firmicutes;Clostridia;Clostridiales;Lachnospiraceae  
Otu483 13 Bacteria  
Otu484 16 Bacteria;Bacteroidetes;Bacteroidia;Bacteroidales;Paraprevotellaceae;Prevotella  
Otu485 10 Bacteria;Firmicutes;Bacilli;Lactobacillales;Aerococcaceae  
Otu338 45 Bacteria;Bacteroidetes;Bacteroidia;Bacteroidales;Bacteroidaceae;Bacteroides  
Otu339 32 Bacteria;Firmicutes;Clostridia;Clostridiales;Lachnospiraceae  
Otu336 30 Bacteria;Firmicutes;Bacilli;Lactobacillales;Aerococcaceae;Facklamia  
Otu337 23 Bacteria;Firmicutes;Erysipelotrichi;Erysipelotrichales;Erysipelotrichaceae;Eubacterium  
Otu334 36 Bacteria;Firmicutes;Clostridia;Clostridiales;Ruminococcaceae  
Otu335 32 Bacteria;Firmicutes;Clostridia;Clostridiales;Lachnospiraceae  
Otu332 53 Bacteria;Proteobacteria;Deltaproteobacteria;GMD14H09  
Otu333 37 Bacteria;Proteobacteria;Deltaproteobacteria;Desulfovibrionales;Desulfovibrionaceae  
Otu330 71 Bacteria;Firmicutes;Clostridia;Clostridiales;Ruminococcaceae;Ruminococcus  
Otu331 90 Bacteria;Firmicutes;Bacilli;Lactobacillales;Carnobacteriaceae;Trichococcus  
Otu645 24 Bacteria;Firmicutes;Bacilli;Lactobacillales;Leuconostocaceae  
Otu792 2 Bacteria;Firmicutes;Clostridia;Clostridiales;Ruminococcaceae  
Otu970 2 Bacteria;Firmicutes;Clostridia;Clostridiales  
Otu793 11 Bacteria;Firmicutes;Clostridia;Clostridiales;Ruminococcaceae  
Otu880 5 Bacteria;Proteobacteria  
Otu1037 2 Bacteria;Firmicutes;Clostridia;Clostridiales;Ruminococcaceae;Oscillospira

Otu657 8 Bacteria;Firmicutes;Clostridia;Clostridiales;Mogibacteriaceae;Mogibacterium  
Otu640 18 Bacteria;Firmicutes;Clostridia;Clostridiales;Tissierellaceae  
Otu641 25 Bacteria;Proteobacteria;Deltaproteobacteria;Desulfovibrionales;Desulfovibrionaceae;Desulfovibrio  
Otu1114 5 Bacteria;Firmicutes;Erysipelotrichi;Erysipelotrichales;Erysipelotrichaceae;RFN20  
Otu1115 2 Bacteria;Bacteroidetes;Bacteroidia;Bacteroidales;Prevotellaceae;Prevotella  
Otu349 25 Bacteria;Firmicutes;Clostridia;Clostridiales;Ruminococcaceae  
Otu348 18 Bacteria;Spirochaetes;Spirochaetes;Spirochaetales;Spirochaetaceae;Treponema  
Otu439 20 Bacteria;Firmicutes;Clostridia;Clostridiales;Ruminococcaceae;Ruminococcus  
Otu438 20 Bacteria;Firmicutes;Clostridia;Clostridiales;Tissierellaceae;Sedimentibacter  
Otu971 2 Bacteria;Bacteroidetes;Bacteroidia;Bacteroidales  
Otu1113 8 Bacteria;Firmicutes;Clostridia;Clostridiales;Ruminococcaceae;Faecalibacterium;Faecalibacterium\_prausnitzii  
Otu343 36 Bacteria;Bacteroidetes;Bacteroidia;Bacteroidales;Paraprevotellaceae  
Otu342 36 Bacteria;Bacteroidetes;Bacteroidia;Bacteroidales;Prevotellaceae;Prevotella  
Otu341 107 Bacteria;Spirochaetes;Spirochaetes;Spirochaetales;Spirochaetaceae;Treponema  
Otu340 67 Bacteria;Proteobacteria;Betaproteobacteria;Burkholderiales;Alcaligenaceae;Oligella  
Otu347 29 Bacteria;Firmicutes;Clostridia;Clostridiales  
Otu346 54 Bacteria;Firmicutes;Clostridia;Clostridiales;Lachnospiraceae  
Otu345 46 Bacteria;Bacteroidetes;Bacteroidia;Bacteroidales;Prevotellaceae;Prevotella  
Otu344 62 Bacteria;Firmicutes;Clostridia;Clostridiales;Ruminococcaceae  
Otu655 14 Bacteria;Firmicutes;Clostridia;Clostridiales  
Otu654 4 Bacteria;Tenericutes;Mollicutes;RF39  
Otu158 173 Bacteria;Bacteroidetes;Bacteroidia;Bacteroidales;Bacteroidaceae;Bacteroides  
Otu159 167 Bacteria;Firmicutes;Clostridia;Clostridiales;Ruminococcaceae  
Otu651 24 Bacteria;Bacteroidetes;Bacteroidia;Bacteroidales  
Otu650 53 Bacteria;Firmicutes;Clostridia;Clostridiales;Lachnospiraceae  
Otu653 15 Bacteria;Firmicutes;Clostridia;Clostridiales;Lachnospiraceae



Otu652 8 Bacteria;Firmicutes;Clostridia;Clostridiales;Lachnospiraceae;Coprococcus  
Otu152 173 Bacteria;Proteobacteria;Gammaproteobacteria  
Otu153 135 Bacteria;Bacteroidetes;Bacteroidia;Bacteroidales;Prevotellaceae;Prevotella  
Otu150 539 Bacteria;Bacteroidetes;Bacteroidia;Bacteroidales  
Otu151 77 Bacteria;Proteobacteria;Alphaproteobacteria;Rhodobacterales;Rhodobacteraceae;Paracoccus  
Otu156 195 Bacteria;Firmicutes;Bacilli;Lactobacillales;Lactobacillaceae;Lactobacillus  
Otu157 188 Bacteria;Bacteroidetes;Bacteroidia;Bacteroidales;S24-7  
Otu154 610 Bacteria;Bacteroidetes;Bacteroidia;Bacteroidales;Paraprevotellaceae;Prevotella  
Otu155 98 Bacteria  
Otu72 376 Bacteria;Firmicutes;Clostridia;Clostridiales;Clostridiaceae;SMB53  
Otu73 568 Bacteria;Firmicutes;Clostridia;Clostridiales;Ruminococcaceae;Oscillospira  
Otu70 1399 Bacteria;Firmicutes;Bacilli;Lactobacillales;Lactobacillaceae;Lactobacillus;Lactobacillus\_reuteri  
Otu71 356 Bacteria;Proteobacteria;Gammaproteobacteria;Aeromonadales;Succinivibrionaceae  
Otu76 295 Bacteria;Bacteroidetes;Bacteroidia;Bacteroidales;Prevotellaceae;Prevotella  
Otu77 716 Bacteria;Firmicutes;Clostridia;Clostridiales;Ruminococcaceae;Oscillospira  
Otu74 318 Bacteria;Bacteroidetes;Bacteroidia;Bacteroidales;Porphyromonadaceae  
Otu75 516 Bacteria;Proteobacteria;Gammaproteobacteria  
Otu930 2 Bacteria;Tenericutes;Mollicutes;Acholeplasmatales;Acholeplasmataceae  
Otu563 12 Bacteria;Firmicutes;Clostridia;Clostridiales;Ruminococcaceae  
Otu78 288 Bacteria;Tenericutes;Mollicutes;Acholeplasmatales;Acholeplasmataceae;Acholeplasma  
Otu79 344 Bacteria;Bacteroidetes;Bacteroidia;Bacteroidales;S24-7  
Otu934 7 Bacteria;Firmicutes;Clostridia;Clostridiales;Ruminococcaceae  
Otu935 9 Bacteria;Firmicutes;Clostridia;Clostridiales;Tissierellaceae;ph2  
Otu936 2 Bacteria;Firmicutes;Clostridia;Clostridiales  
Otu562 14 Bacteria;Firmicutes;Clostridia;Clostridiales;Lachnospiraceae;Coprococcus  
Otu1135 4 Bacteria;Proteobacteria;Betaproteobacteria;Burkholderiales;Alcaligenaceae;Sutterella

Otu1132 45 Bacteria;Proteobacteria;Gammaproteobacteria;Alteromonadales;Alteromonadaceae;BD2-13  
Otu959 11 Bacteria  
Otu1162 2 Bacteria;Bacteroidetes;Bacteroidia;Bacteroidales  
Otu915 2 Bacteria;Synergistetes;Synergistia;Synergistales;Synergistaceae  
Otu1133 5 Bacteria;Firmicutes;Clostridia;Clostridiales;Ruminococcaceae  
Otu237 128 Bacteria;Cyanobacteria;4C0d-2;YS2  
Otu236 110 Bacteria;Bacteroidetes;Bacteroidia;Bacteroidales;Prevotellaceae  
Otu235 44 Bacteria;Firmicutes;Bacilli;Lactobacillales;Enterococcaceae;Vagococcus  
Otu234 70 Bacteria;Tenericutes;Mollicutes;Acholeplasmatales;Acholeplasmataceae;Acholeplasma  
Otu233 234 Bacteria;Bacteroidetes;Bacteroidia;Bacteroidales;Prevotellaceae;Prevotella  
Otu232 80 Bacteria;Spirochaetes;Spirochaetes;Spirochaetales;Spirochaetaceae;Treponema  
Otu231 65 Bacteria;Firmicutes;Clostridia;Clostridiales;Lachnospiraceae  
Otu230 54 Bacteria;Firmicutes;Clostridia;Clostridiales;Tissierellaceae  
Otu909 2 Bacteria;Firmicutes;Clostridia;Clostridiales;Lachnospiraceae  
Otu1038 2 Bacteria;Firmicutes;Clostridia;Clostridiales;Ruminococcaceae  
Otu378 32 Bacteria;Proteobacteria;Deltaproteobacteria;Desulfovibrionales;Desulfovibrionaceae  
Otu239 93 Bacteria;Firmicutes;Clostridia;Clostridiales;Ruminococcaceae  
Otu238 188 Bacteria;Bacteroidetes;Flavobacteriia;Flavobacteriales;Weeksellaceae  
Otu952 3 Bacteria;Firmicutes;Clostridia;Clostridiales;Ruminococcaceae  
Otu953 5 Bacteria;Firmicutes;Clostridia;Clostridiales;Ruminococcaceae  
Otu974 9 Bacteria;Tenericutes;Mollicutes;RF39  
Otu899 2 Bacteria  
Otu804 90 Bacteria;Firmicutes;Clostridia;Clostridiales;Ruminococcaceae  
Otu805 2 Bacteria;Firmicutes;Clostridia;Clostridiales;Lachnospiraceae  
Otu806 7 Bacteria;Firmicutes;Erysipelotrichi;Erysipelotrichales;Erysipelotrichaceae;Bulleidia  
Otu807 3 Bacteria

Otu800 2 Bacteria;Bacteroidetes;Bacteroidia;Bacteroidales;Prevotellaceae;Prevotella  
Otu569 17 Bacteria;Firmicutes;Clostridia;Clostridiales;Lachnospiraceae;Coprococcus  
Otu802 2 Bacteria;Firmicutes;Clostridia;Clostridiales  
Otu803 114 Bacteria;Firmicutes;Clostridia;Clostridiales;Ruminococcaceae  
Otu1151 2 Bacteria;Tenericutes;Mollicutes;Acholeplasmatales;Acholeplasmataceae  
Otu956 4 Bacteria;Tenericutes;Mollicutes;Acholeplasmatales;Acholeplasmataceae  
Otu568 9 Bacteria;Spirochaetes;Spirochaetes;Spirochaetales;Spirochaetaceae;Treponema  
Otu808 7 Bacteria;Firmicutes;Clostridia;Clostridiales  
Otu809 13 Bacteria;Firmicutes;Clostridia;Clostridiales;Tissierellaceae  
Otu957 2 Bacteria;Firmicutes;Clostridia;Clostridiales  
Otu1016 41 Bacteria  
Otu770 3 Bacteria;Firmicutes;Clostridia;Clostridiales;Ruminococcaceae;Oscillospira  
Otu913 23 Bacteria;Cyanobacteria;4C0d-2;YS2  
Otu771 120 Bacteria;Proteobacteria;Gammaproteobacteria;Pseudomonadales;Pseudomonadaceae  
Otu612 11 Bacteria;Firmicutes;Clostridia;Clostridiales;Veillonellaceae;Dialister  
Otu893 2 Bacteria;Bacteroidetes;Bacteroidia;Bacteroidales;Prevotellaceae;Prevotella  
Otu881 2 Bacteria  
Otu810 4 Bacteria;Proteobacteria;Betaproteobacteria;Burkholderiales  
Otu892 8 Bacteria;Firmicutes;Clostridia;Clostridiales  
Otu891 2 Bacteria;Bacteroidetes;Bacteroidia;Bacteroidales;Prevotellaceae;Prevotella  
Otu1108 2 Bacteria;Firmicutes  
Otu166 54 Bacteria;Bacteroidetes;Bacteroidia;Bacteroidales;Porphyromonadaceae;Paludibacter  
Otu890 2 Bacteria;Tenericutes;Mollicutes;Acholeplasmatales;Acholeplasmataceae;Acholeplasma  
Otu897 5 Bacteria;Firmicutes;Clostridia;Clostridiales;Ruminococcaceae  
Otu1009 20 Bacteria;Spirochaetes;Spirochaetes;Spirochaetales;Spirochaetaceae;Treponema  
Otu896 2 Bacteria;Bacteroidetes;Bacteroidia;Bacteroidales

Otu1155 9 Bacteria;Firmicutes;Clostridia;Clostridiales;Lachnospiraceae  
Otu961 3 Bacteria;Firmicutes;Clostridia;Clostridiales;Tissierellaceae;Gallicola  
Otu778 2 Bacteria;Firmicutes  
Otu1051 7 Bacteria;Proteobacteria;Alphaproteobacteria;RF32  
Otu779 381 Bacteria;Firmicutes;Clostridia;Clostridiales;Ruminococcaceae  
Otu1050 3 Bacteria;Firmicutes;Clostridia;Clostridiales  
Otu168 73 Bacteria;Proteobacteria  
Otu724 28 Bacteria;Bacteroidetes;Bacteroidia;Bacteroidales;Porphyromonadaceae;Dysgonomonas  
Otu1138 8 Bacteria;Tenericutes;RF3;ML615J-28  
Otu948 7 Bacteria;Firmicutes  
Otu8 3600 Bacteria;Bacteroidetes;Bacteroidia;Bacteroidales;Prevotellaceae;Prevotella  
Otu9 4538 Bacteria;Bacteroidetes;Flavobacteriia;Flavobacteriales;Weeksellaceae  
Otu6 6407 Bacteria;Proteobacteria;Gammaproteobacteria;Pseudomonadales;Moraxellaceae;Acinetobacter  
Otu7 3334 Bacteria;Proteobacteria;Betaproteobacteria;Burkholderiales;Comamonadaceae;Comamonas  
Otu4 7206 Bacteria;Firmicutes;Bacilli;Lactobacillales;Lactobacillaceae;Lactobacillus  
Otu5 4873 Bacteria;Proteobacteria;Gammaproteobacteria;Pseudomonadales;Pseudomonadaceae  
Otu2 11643 Bacteria;Proteobacteria;Gammaproteobacteria;Pseudomonadales;Pseudomonadaceae;Pseudomonas  
Otu3 4748 Bacteria;Bacteroidetes;Bacteroidia;Bacteroidales;Bacteroidaceae;Bacteroides;Bacteroides\_coprosuis  
Otu1 10973 Bacteria;Spirochaetes;Spirochaetes;Spirochaetales;Spirochaetaceae;Treponema  
Otu387 29 Bacteria;Firmicutes;Clostridia;Clostridiales;Lachnospiraceae;Coproccoccus  
Otu386 28 Bacteria;Firmicutes;Clostridia;Clostridiales;Clostridiaceae;Clostridium  
Otu385 21 Bacteria;Firmicutes;Clostridia;Clostridiales;Peptococcaceae;Niigata-25  
Otu941 4 Bacteria;Firmicutes;Clostridia;Clostridiales;Ruminococcaceae;Ruminococcus  
Otu471 26 Bacteria;Tenericutes;Mollicutes;Acholeplasmatales;Acholeplasmataceae;Acholeplasma  
Otu470 196 Bacteria;Firmicutes;Bacilli;Bacillales;Planococcaceae;Lysinibacillus  
Otu473 25 Bacteria;Proteobacteria;Alphaproteobacteria;Rhodobacterales;Rhodobacteraceae;Rhodobacter

Otu384 21 Bacteria;Proteobacteria;Gammaproteobacteria  
Otu475 25 Bacteria;Proteobacteria;Gammaproteobacteria;Enterobacteriales;Enterobacteriaceae;Proteus  
Otu474 6 Bacteria;Firmicutes;Clostridia;Clostridiales;Mogibacteriaceae  
Otu477 17 Bacteria;Spirochaetes;Spirochaetes;Sphaerochaetales;Sphaerochaetaceae;Sphaerochaeta  
Otu476 22 Bacteria;Bacteroidetes;Bacteroidia;Bacteroidales  
Otu479 16 Bacteria;Firmicutes;Clostridia;Clostridiales;Lachnospiraceae  
Otu383 14 Bacteria;Bacteroidetes;Bacteroidia;Bacteroidales;Porphyromonadaceae;Dysgonomonas  
Otu382 35 Bacteria;Firmicutes;Erysipelotrichi;Erysipelotrichales;Erysipelotrichaceae;Eubacterium;Eubacterium\_biforme  
Otu578 18 Bacteria;Bacteroidetes;Bacteroidia;Bacteroidales;Rikenellaceae  
Otu579 1821 Bacteria;Bacteroidetes;Bacteroidia;Bacteroidales;Prevotellaceae;Prevotella  
Otu1013 6 Bacteria;Firmicutes;Clostridia;Clostridiales;Ruminococcaceae;Oscillospira  
Otu1012 8 Bacteria;Firmicutes;Clostridia;Clostridiales  
Otu648 10 Bacteria;Firmicutes;Clostridia;Clostridiales;Ruminococcaceae;Butyricoccus;Butyricoccus\_pullicaeorum  
Otu381 31 Bacteria;Firmicutes;Clostridia;Clostridiales;Ruminococcaceae  
Otu1017 10 Bacteria;Firmicutes;Clostridia;Clostridiales;Lachnospiraceae  
Otu746 2 Bacteria;Firmicutes;Clostridia;Clostridiales;Veillonellaceae;Phascolarctobacterium  
Otu570 23 Bacteria;Firmicutes;Clostridia;Clostridiales;Lachnospiraceae;Blautia;Blautia\_producta  
Otu571 7 Bacteria  
Otu572 16 Bacteria;Firmicutes;Clostridia;Clostridiales;Ruminococcaceae  
Otu380 40 Bacteria;Firmicutes;Clostridia;Clostridiales;Clostridiaceae;Clostridium  
Otu574 15 Bacteria;Firmicutes;Clostridia;Clostridiales;Lachnospiraceae  
Otu575 24 Bacteria;Firmicutes;Clostridia;Clostridiales  
Otu576 4 Bacteria;Proteobacteria;Alphaproteobacteria;Rhizobiales;Rhizobiaceae;Agrobacterium  
Otu577 5 Bacteria;Firmicutes;Clostridia;Clostridiales;Peptococcaceae  
Otu619 2249 Bacteria;Bacteroidetes;Bacteroidia;Bacteroidales;Porphyromonadaceae  
Otu618 9 Bacteria;Verrucomicrobia;Verruco-5;WCHB1-41;RFP12

Otu752 5 Bacteria;Firmicutes;Clostridia;Clostridiales  
Otu744 2 Bacteria;Firmicutes  
Otu754 16 Bacteria;Firmicutes;Clostridia;Clostridiales;Mogibacteriaceae  
Otu755 17 Bacteria;Firmicutes;Clostridia;Clostridiales  
Otu208 72 Bacteria;Bacteroidetes;Bacteroidia;Bacteroidales;Prevotellaceae;Prevotella  
Otu209 81 Bacteria;Firmicutes;Clostridia;Clostridiales;Ruminococcaceae  
Otu206 153 Bacteria;Firmicutes;Clostridia;Clostridiales;Ruminococcaceae;Faecalibacterium;Faecalibacterium\_prausnitzii  
Otu207 83 Bacteria;Firmicutes;Bacilli;Lactobacillales;Aerococcaceae;Aerococcus  
Otu204 70 Bacteria;Bacteroidetes;Bacteroidia;Bacteroidales;S24-7  
Otu205 45 Bacteria;Cyanobacteria;4C0d-2;YS2  
Otu202 99 Bacteria;Firmicutes;Clostridia;Clostridiales;Ruminococcaceae  
Otu203 113 Bacteria;Firmicutes;Clostridia;Clostridiales;Lachnospiraceae  
Otu200 76 Bacteria;Bacteroidetes;Bacteroidia;Bacteroidales;Marinilabiaceae  
Otu201 67 Bacteria;Actinobacteria;Coriobacteriia;Coriobacteriales;Coriobacteriaceae  
Otu659 4 Bacteria  
Otu741 6 Bacteria;Proteobacteria;Alphaproteobacteria;Rhizobiales;Hyphomicrobiaceae;Devosia  
Otu767 2 Bacteria;Bacteroidetes;Bacteroidia;Bacteroidales  
Otu740 28 Bacteria;Firmicutes;Clostridia;Clostridiales;Ruminococcaceae  
Otu620 9 Bacteria;Bacteroidetes;Bacteroidia;Bacteroidales;p-2534-18B5  
Otu682 16 Bacteria;Bacteroidetes;Bacteroidia;Bacteroidales;Porphyromonadaceae  
Otu683 3 Bacteria;Bacteroidetes;Sphingobacteriia;Sphingobacteriales;Sphingobacteriaceae;Sphingobacterium  
Otu680 6 Bacteria  
Otu681 44 Bacteria;Proteobacteria;Betaproteobacteria;Burkholderiales;Comamonadaceae;Hylemonella  
Otu686 3 Bacteria;Thermi;Deinococci;Deinococcales;Trueperaceae  
Otu687 3 Bacteria;Firmicutes;Clostridia;Clostridiales;Lachnospiraceae  
Otu684 11 Bacteria;Firmicutes;Clostridia;Clostridiales;Ruminococcaceae;Ruminococcus

Otu685 7 Bacteria;Bacteroidetes;Bacteroidia;Bacteroidales;Prevotellaceae;Prevotella  
Otu688 26 Bacteria;Bacteroidetes;Bacteroidia;Bacteroidales;Bacteroidaceae;Bacteroides;Bacteroides\_ovatus  
Otu689 4 Bacteria;Firmicutes;Clostridia;Clostridiales;Ruminococcaceae  
Otu658 6 Bacteria;Elusimicrobia;Elusimicrobia;Elusimicrobiales;Elusimicrobiaceae  
Otu372 25 Bacteria;Firmicutes;Clostridia;Clostridiales;Peptococcaceae;Peptococcus  
Otu373 15 Bacteria;Firmicutes;Clostridia;Clostridiales;Ruminococcaceae;Butyricoccus;Butyricoccus\_pullicaecorum  
Otu279 38 Bacteria;Proteobacteria;Alphaproteobacteria;Rhizobiales;Hyphomicrobiaceae;Devosia  
Otu278 82 Bacteria;Bacteroidetes;Bacteroidia;Bacteroidales  
Otu376 34 Bacteria;Firmicutes;Clostridia;Clostridiales;Ruminococcaceae;Ruminococcus  
Otu377 58 Bacteria;Firmicutes;Clostridia;Clostridiales;Veillonellaceae  
Otu374 28 Bacteria;Bacteroidetes;Bacteroidia;Bacteroidales;p-2534-18B5  
Otu375 29 Bacteria;Firmicutes;Clostridia;Clostridiales;Ruminococcaceae  
Otu273 54 Bacteria;Firmicutes;Clostridia;Clostridiales;Veillonellaceae;Dialister  
Otu272 69 Bacteria;Firmicutes;Clostridia;Clostridiales;Clostridiaceae;Alkaliphilus  
Otu271 59 Bacteria;Bacteroidetes;Bacteroidia;Bacteroidales;Paraprevotellaceae;Prevotella  
Otu270 63 Bacteria;Firmicutes;Clostridia;Clostridiales  
Otu277 81 Bacteria;Firmicutes;Clostridia;Clostridiales;Ruminococcaceae;Faecalibacterium;Faecalibacterium\_prausnitzii  
Otu276 65 Bacteria  
Otu275 107 Bacteria;Proteobacteria;Betaproteobacteria;Burkholderiales;Alcaligenaceae  
Otu274 32 Bacteria;Tenericutes;RF3;ML615J-28  
Otu105 230 Bacteria;Bacteroidetes;Bacteroidia;Bacteroidales;RF16  
Otu104 229 Bacteria;Firmicutes;Clostridia;Clostridiales;Christensenellaceae  
Otu107 327 Bacteria;Bacteroidetes;Bacteroidia;Bacteroidales;Prevotellaceae;Prevotella  
Otu106 185 Bacteria;Bacteroidetes  
Otu101 284 Bacteria;Spirochaetes;Spirochaetes;Spirochaetales;Spirochaetaceae;Treponema  
Otu100 1186 Bacteria;Firmicutes;Clostridia;Clostridiales;Ruminococcaceae

Otu103 139 Bacteria;Bacteroidetes  
Otu102 191 Bacteria;Proteobacteria;Gammaproteobacteria  
Otu894 5 Bacteria;Firmicutes;Clostridia;Clostridiales;Lachnospiraceae  
Otu109 165 Bacteria;Proteobacteria;Alphaproteobacteria;Rhizobiales;Phyllobacteriaceae  
Otu108 643 Bacteria;Bacteroidetes;Bacteroidia;Bacteroidales  
Otu940 8 Bacteria;Firmicutes;Clostridia;Clostridiales;Lachnospiraceae  
Otu295 52 Bacteria;Firmicutes;Clostridia;Clostridiales;Clostridiaceae  
Otu294 99 Bacteria;Bacteroidetes;Bacteroidia;Bacteroidales;Paraprevotellaceae;CF231  
Otu297 30 Bacteria;Proteobacteria;Alphaproteobacteria;Rhodobacterales;Rhodobacteraceae  
Otu296 49 Bacteria;Firmicutes;Clostridia;Clostridiales  
Otu291 18 Bacteria;Bacteroidetes;Bacteroidia;Bacteroidales;Porphyromonadaceae;Dysgonomonas  
Otu290 30 Bacteria;Bacteroidetes;Bacteroidia;Bacteroidales;Paraprevotellaceae  
Otu293 51 Bacteria;Proteobacteria;Betaproteobacteria;Rhodocyclales;Rhodocyclaceae  
Otu292 36 Bacteria;Proteobacteria;Alphaproteobacteria;Sphingomonadales  
Otu299 45 Bacteria;Bacteroidetes;Bacteroidia;Bacteroidales;Paraprevotellaceae  
Otu298 65 Bacteria;Bacteroidetes;Bacteroidia;Bacteroidales;Prevotellaceae;Prevotella  
Otu703 7 Bacteria;Firmicutes;Clostridia;Clostridiales;Dehalobacteriaceae  
Otu702 4 Bacteria;Bacteroidetes  
Otu701 9 Bacteria;Firmicutes;Clostridia;Clostridiales;Ruminococcaceae;Ruminococcus  
Otu497 14 Bacteria;Proteobacteria;Gammaproteobacteria;Alteromonadales;Alteromonadaceae  
Otu700 10 Bacteria;Verrucomicrobia;Verruco-5;WCHB1-41;WCHB1-25  
Otu944 7 Bacteria;Bacteroidetes;Bacteroidia;Bacteroidales;Porphyromonadaceae;Paludibacter  
Otu198 115 Bacteria;Firmicutes;Erysipelotrichi;Erysipelotrichales;Erysipelotrichaceae;Bulleidia;Bulleidia\_p-1630-c5  
Otu199 260 Bacteria;Bacteroidetes;Bacteroidia;Bacteroidales;Prevotellaceae;Prevotella  
Otu196 160 Bacteria;Firmicutes;Clostridia;Clostridiales;Ruminococcaceae  
Otu197 419 Bacteria;Bacteroidetes;Bacteroidia;Bacteroidales;Porphyromonadaceae;Parabacteroides



Otu194 68 Bacteria;Bacteroidetes;Bacteroidia;Bacteroidales;Prevotellaceae;Prevotella  
Otu195 95 Bacteria;Planctomycetes;Planctomycetia;Pirellulales;Pirellulaceae  
Otu192 75 Bacteria;Proteobacteria;Gammaproteobacteria;Pseudomonadales;Moraxellaceae;Psychrobacter  
Otu193 95 Bacteria;Bacteroidetes;Bacteroidia;Bacteroidales;Prevotellaceae;Prevotella  
Otu190 66 Bacteria;Bacteroidetes;Flavobacteriia;Flavobacteriales;Cryomorphaceae  
Otu191 122 Bacteria;Bacteroidetes;Bacteroidia;Bacteroidales;S24-7  
Otu840 9 Bacteria;Firmicutes;Clostridia;Clostridiales;Ruminococcaceae  
Otu494 9 Bacteria;Fibrobacteres;Fibrobacteria;Fibrobacterales;Fibrobacteraceae;Fibrobacter  
Otu705 4 Bacteria;Firmicutes;Erysipelotrichi;Erysipelotrichales;Erysipelotrichaceae  
Otu493 25 Bacteria;Firmicutes;Clostridia;Clostridiales;Ruminococcaceae;Oscillospira  
Otu704 3 Bacteria;Firmicutes;Bacilli;Bacillales;Planococcaceae  
Otu743 2 Bacteria;Firmicutes;Clostridia;Clostridiales;Lachnospiraceae  
Otu492 10 Bacteria;Tenericutes;Mollicutes;RF39  
Otu491 14 Bacteria;Tenericutes;Mollicutes;RF39  
Otu490 12 Bacteria;Proteobacteria;Alphaproteobacteria;Rhizobiales;Hyphomicrobiaceae;Devosia  
Otu996 8 Bacteria;Bacteroidetes;Bacteroidia;Bacteroidales;Porphyromonadaceae;Dysgonomonas  
Otu997 3 Bacteria;Firmicutes  
Otu994 2 Bacteria;Firmicutes;Clostridia;Clostridiales  
Otu995 12 Bacteria;Firmicutes;Clostridia;Clostridiales;Lachnospiraceae  
Otu992 4 Bacteria;Cyanobacteria;4C0d-2;YS2  
Otu993 7 Bacteria;Proteobacteria;Betaproteobacteria;Burkholderiales;Alcaligenaceae;Sutterella  
Otu859 2 Bacteria;Proteobacteria;Gammaproteobacteria  
Otu858 6 Bacteria;Firmicutes;Clostridia;Clostridiales  
Otu857 2 Bacteria;Proteobacteria;Alphaproteobacteria;Rhizobiales  
Otu856 3 Bacteria;Tenericutes;Mollicutes;RF39  
Otu855 3 Bacteria;Proteobacteria;Gammaproteobacteria;Pseudomonadales;Pseudomonadaceae

Otu854 5 Bacteria;Actinobacteria;Actinobacteria;Bifidobacteriales;Bifidobacteriaceae;Bifidobacterium  
Otu853 5 Bacteria;Firmicutes;Clostridia;Clostridiales  
Otu852 2 Bacteria;Bacteroidetes;Cytophagia;Cytophagales  
Otu851 16 Bacteria;Cyanobacteria;4C0d-2;YS2  
Otu850 2 Bacteria;Firmicutes;Clostridia;Clostridiales;Ruminococcaceae  
Otu98 304 Bacteria;Firmicutes;Clostridia;Clostridiales;Tissierellaceae  
Otu99 196 Bacteria;Proteobacteria;Betaproteobacteria;Burkholderiales;Oxalobacteraceae;Oxalobacter  
Otu960 7 Bacteria;Firmicutes;Clostridia;Clostridiales;Ruminococcaceae  
Otu94 167 Bacteria;Proteobacteria;Alphaproteobacteria;Sphingomonadales;Sphingomonadaceae  
Otu95 860 Bacteria;Firmicutes;Clostridia;Clostridiales;Ruminococcaceae  
Otu96 352 Bacteria;Firmicutes;Clostridia;Clostridiales;Tissierellaceae;Anaerococcus  
Otu97 173 Bacteria;Bacteroidetes  
Otu90 298 Bacteria;Firmicutes;Clostridia;Clostridiales;Ruminococcaceae  
Otu91 204 Bacteria;Proteobacteria;Epsilonproteobacteria;Campylobacteriales;Campylobacteraceae;Arcobacter;Arcobacter\_cryaerophilus  
Otu92 136 Bacteria;Bacteroidetes;Flavobacteriia;Flavobacteriales;Flavobacteriaceae;Myroides  
Otu93 386 Bacteria;Bacteroidetes;Bacteroidia;Bacteroidales;S24-7  
Otu984 6 Archaea;Euryarchaeota;Methanobacteria;Methanobacteriales;Methanobacteriaceae;Methanobrevibacter  
Otu949 4 Bacteria;Firmicutes;Clostridia;Clostridiales  
Otu1148 3 Bacteria;Firmicutes;Bacilli;Lactobacillales;Aerococcaceae;Facklamia  
Otu1055 2 Bacteria;Bacteroidetes;Bacteroidia;Bacteroidales;Prevotellaceae;Prevotella  
Otu1054 3 Bacteria;Actinobacteria;Actinobacteria;Actinomycetales  
Otu1057 5 Bacteria  
Otu1056 2 Bacteria  
Otu538 16 Bacteria;Firmicutes;Clostridia;Clostridiales;Ruminococcaceae  
Otu539 20 Bacteria;Bacteroidetes;Bacteroidia;Bacteroidales;Bacteroidaceae;Bacteroides  
Otu1053 2 Bacteria;Firmicutes;Clostridia;Clostridiales

Otu1052 3 Bacteria;Firmicutes;Clostridia;Clostridiales  
Otu534 20 Bacteria;Firmicutes;Clostridia;Clostridiales;Mogibacteriaceae  
Otu535 13 Bacteria;Firmicutes;Clostridia;Clostridiales;Ruminococcaceae  
Otu536 18 Bacteria;Fibrobacteres;Fibrobacteria;Fibrobacterales;Fibrobacteraceae;Fibrobacter  
Otu537 32 Bacteria;Firmicutes;Clostridia;Clostridiales  
Otu530 8 Bacteria;Proteobacteria;Gammaproteobacteria;Thiotrichales;Piscirickettsiaceae  
Otu531 21 Bacteria;Spirochaetes;Spirochaetes  
Otu532 21 Bacteria;Verrucomicrobia;Verruco-5;WCHB1-41;RFP12  
Otu533 20 Bacteria;Bacteroidetes;Bacteroidia;Bacteroidales;Paraprevotellaceae;YRC22  
Otu1119 3 Bacteria  
Otu973 5 Bacteria;Firmicutes;Clostridia;Clostridiales;Mogibacteriaceae  
Otu987 3 Bacteria;Verrucomicrobia;Verruco-5;WCHB1-41;RFP12  
Otu329 65 Bacteria;Proteobacteria;Betaproteobacteria;Burkholderiales;Alcaligenaceae  
Otu328 42 Bacteria;Firmicutes;Clostridia;Clostridiales;Lachnospiraceae;Butyrivibrio  
Otu499 9 Bacteria;Proteobacteria;Alphaproteobacteria;RF32  
Otu498 8 Bacteria;Proteobacteria;Gammaproteobacteria;Alteromonadales;Alteromonadaceae;Cellvibrio  
Otu325 24 Bacteria;Verrucomicrobia;Verruco-5;WCHB1-41;RFP12  
Otu324 58 Bacteria;Bacteroidetes;Bacteroidia;Bacteroidales;Bacteroidaceae  
Otu327 28 Bacteria;Tenericutes;RF3;ML615J-28  
Otu326 66 Bacteria;Firmicutes;Clostridia;Clostridiales  
Otu321 24 Bacteria;Firmicutes;Clostridia;Clostridiales;Tissierellaceae  
Otu320 46 Bacteria;Firmicutes;Clostridia;Clostridiales;Lachnospiraceae  
Otu323 76 Bacteria;Firmicutes;Clostridia;Clostridiales;Ruminococcaceae;Oscillospira  
Otu322 60 Bacteria;Bacteroidetes;Bacteroidia;Bacteroidales  
Otu975 6 Bacteria;Firmicutes;Clostridia;Clostridiales;Ruminococcaceae  
Otu302 44 Bacteria;Verrucomicrobia;Verruco-5;WCHB1-41;RFP12

Otu958 4 Bacteria;Tenericutes;Mollicutes;RF39  
Otu742 3 Bacteria;Firmicutes;Clostridia;Clostridiales;Tissierellaceae  
Otu1118 3 Bacteria;Firmicutes;Clostridia;Clostridiales;Ruminococcaceae  
Otu408 34 Bacteria;Firmicutes;Clostridia;Clostridiales;Caldicoprobacteraceae;Caldicoprobacter  
Otu409 34 Bacteria;Firmicutes;Clostridia;Clostridiales;Lachnospiraceae;Oribacterium  
Otu1123 2 Bacteria;Proteobacteria  
Otu1122 2 Bacteria;Tenericutes;Mollicutes;RF39  
Otu1125 2 Bacteria;Firmicutes;Clostridia;Clostridiales;Ruminococcaceae  
Otu1124 7 Bacteria;Firmicutes;Clostridia;Clostridiales;Ruminococcaceae;Oscillospira  
Otu1127 2 Bacteria;Proteobacteria;Betaproteobacteria;Burkholderiales;Burkholderiaceae;Salinispora;Salinispora\_tropica  
Otu1126 2 Bacteria;Firmicutes;Clostridia;Clostridiales;Ruminococcaceae  
Otu400 28 Bacteria;Firmicutes;Clostridia;Clostridiales;Ruminococcaceae;Ruminococcus  
Otu401 26 Bacteria;Bacteroidetes;Bacteroidia;Bacteroidales;Paraprevotellaceae;Prevotella  
Otu402 36 Bacteria;Bacteroidetes;Bacteroidia;Bacteroidales;Bacteroidaceae;Bacteroides  
Otu403 17 Bacteria;Firmicutes;Clostridia;Clostridiales  
Otu404 20 Bacteria;Bacteroidetes;Bacteroidia;Bacteroidales;S24-7  
Otu405 48 Bacteria;Proteobacteria;Betaproteobacteria;Burkholderiales  
Otu406 42 Bacteria;Proteobacteria;Betaproteobacteria;Burkholderiales;Alcaligenaceae  
Otu407 27 Bacteria;Firmicutes;Clostridia;Clostridiales;Ruminococcaceae;Faecalibacterium;Faecalibacterium\_prausnitzii  
Otu149 361 Bacteria;Firmicutes;Clostridia;Clostridiales;Veillonellaceae;Mitsuokella  
Otu148 88 Bacteria;Firmicutes;Clostridia;Clostridiales;Tissierellaceae;Tissierella\_Soehngenia  
Otu662 17 Bacteria;Firmicutes;Clostridia;Clostridiales;Christensenellaceae  
Otu663 10 Bacteria;Bacteroidetes;Bacteroidia;Bacteroidales;Bacteroidaceae;Bacteroides  
Otu664 13 Bacteria;Firmicutes;Clostridia;Clostridiales;Ruminococcaceae;Oscillospira  
Otu665 23 Bacteria;Firmicutes;Clostridia;Clostridiales;Christensenellaceae  
Otu666 5 Bacteria;Firmicutes;Clostridia;Clostridiales;Lachnospiraceae

Otu667 16 Bacteria;Firmicutes;Clostridia;Clostridiales;Lachnospiraceae;Blautia  
Otu141 352 Bacteria;Firmicutes;Clostridia;Clostridiales;Clostridiaceae;02d06  
Otu140 94 Bacteria;Firmicutes;Clostridia;Clostridiales;Clostridiaceae;Clostridium;Clostridium\_tetani  
Otu143 101 Bacteria;Firmicutes;Clostridia;Clostridiales;Veillonellaceae  
Otu142 176 Bacteria;Bacteroidetes;Bacteroidia;Bacteroidales  
Otu145 107 Bacteria;Bacteroidetes;Flavobacteriia;Flavobacteriales;Flavobacteriaceae;Myroides;Myroides\_odoratimimus  
Otu144 177 Bacteria;Firmicutes;Clostridia;Clostridiales;Veillonellaceae;Anaerovibrio  
Otu147 66 Bacteria;Firmicutes;Clostridia;Clostridiales;Veillonellaceae;Selenomonas;Selenomonas\_lacticifex  
Otu146 168 Bacteria;Tenericutes;Mollicutes;Acholeplasmatales;Acholeplasmataceae;Acholeplasma  
Otu390 24 Bacteria;Firmicutes;Clostridia;Clostridiales  
Otu391 21 Bacteria;Firmicutes;Clostridia;Clostridiales;Lachnospiraceae;Lachnospira  
Otu392 26 Bacteria;Firmicutes;Clostridia;Clostridiales;Ruminococcaceae  
Otu393 23 Bacteria;Bacteroidetes;Bacteroidia;Bacteroidales  
Otu394 24 Bacteria;Firmicutes;Clostridia;Clostridiales;Christensenellaceae  
Otu395 16 Bacteria;Bacteroidetes;Bacteroidia;Bacteroidales;Porphyromonadaceae;Porphyromonas  
Otu49 1397 Bacteria;Bacteroidetes;Bacteroidia;Bacteroidales;Prevotellaceae;Prevotella  
Otu48 737 Bacteria;Tenericutes;Mollicutes;Acholeplasmatales;Acholeplasmataceae  
Otu47 900 Bacteria;Bacteroidetes;Bacteroidia;Bacteroidales;Paraprevotellaceae;CF231  
Otu46 608 Bacteria;Proteobacteria;Gammaproteobacteria;Enterobacteriales;Enterobacteriaceae;Providencia  
Otu45 1197 Bacteria;Firmicutes;Clostridia;Clostridiales;Lachnospiraceae  
Otu44 504 Bacteria;Bacteroidetes;Flavobacteriia;Flavobacteriales;Flavobacteriaceae  
Otu43 835 Bacteria;Bacteroidetes  
Otu42 623 Bacteria;Bacteroidetes;Bacteroidia;Bacteroidales;Prevotellaceae;Prevotella  
Otu41 1246 Bacteria;Bacteroidetes;Bacteroidia;Bacteroidales;Prevotellaceae;Prevotella  
Otu40 1529 Bacteria;Firmicutes;Clostridia;Clostridiales;Christensenellaceae  
Otu1121 2 Bacteria;Firmicutes;Clostridia;Clostridiales

Otu1120 3 Bacteria;Firmicutes;Clostridia;Clostridiales;Lachnospiraceae;Clostridium  
Otu1144 5 Bacteria;Firmicutes;Clostridia;Clostridiales;Ruminococcaceae  
Otu242 21 Bacteria;Proteobacteria;Gammaproteobacteria;Xanthomonadales;Xanthomonadaceae  
Otu243 122 Bacteria;Bacteroidetes;Bacteroidia;Bacteroidales;Prevotellaceae;Prevotella  
Otu240 80 Bacteria;Proteobacteria;Gammaproteobacteria;Xanthomonadales;Xanthomonadaceae  
Otu241 77 Bacteria;Spirochaetes;Spirochaetes;Spirochaetales;Spirochaetaceae;Treponema  
Otu246 43 Bacteria;Firmicutes;Clostridia;Clostridiales;Lachnospiraceae  
Otu247 48 Bacteria;Proteobacteria;Alphaproteobacteria;Sphingomonadales;Sphingomonadaceae  
Otu244 87 Bacteria;Firmicutes;Clostridia;Clostridiales;Clostridiaceae;Clostridium;Clostridium\_butyricum  
Otu245 45 Bacteria;Firmicutes;Clostridia;Clostridiales;Ruminococcaceae  
Otu248 58 Bacteria;Tenericutes;Mollicutes;Acholeplasmatales;Acholeplasmataceae;Acholeplasma  
Otu249 127 Bacteria;Firmicutes;Clostridia;Clostridiales;Ruminococcaceae  
Otu718 123 Bacteria;Bacteroidetes;Bacteroidia;Bacteroidales;Porphyromonadaceae  
Otu719 4 Bacteria;Firmicutes;Clostridia;Clostridiales;Ruminococcaceae  
Otu1142 3 Bacteria;Firmicutes;Clostridia;Clostridiales;Tissierellaceae  
Otu813 9 Bacteria;Firmicutes;Clostridia;Clostridiales  
Otu812 6 Bacteria;Firmicutes;Clostridia;Clostridiales  
Otu811 2 Bacteria;Firmicutes;Clostridia;Clostridiales  
Otu472 14 Bacteria;Tenericutes;Mollicutes;RF39  
Otu817 5 Bacteria;Bacteroidetes;Bacteroidia;Bacteroidales;Prevotellaceae;Prevotella  
Otu816 5 Bacteria;Proteobacteria;Deltaproteobacteria;Desulfovibrionales;Desulfovibrionaceae  
Otu815 5 Bacteria;Proteobacteria;Deltaproteobacteria;Bdellovibrionales;Bacteriovoracaceae  
Otu814 8 Bacteria;Tenericutes;Mollicutes;RF39  
Otu819 12 Bacteria;Bacteroidetes;Flavobacteriia;Flavobacteriales;Flavobacteriaceae  
Otu818 3 Bacteria  
Otu1154 4 Bacteria;Firmicutes;Bacilli;Lactobacillales;Aerococcaceae

Otu1039 5 Bacteria;Firmicutes;Clostridia;Clostridiales  
Otu1153 2 Bacteria;Firmicutes  
Otu963 6 Bacteria;Bacteroidetes;Bacteroidia;Bacteroidales  
Otu478 22 Bacteria;Firmicutes;Clostridia;Clostridiales;Ruminococcaceae  
Otu1150 32 Bacteria;Firmicutes;Clostridia;Clostridiales  
Otu660 3 Bacteria;Firmicutes  
Otu918 7 Bacteria;Firmicutes;Clostridia;Clostridiales  
Otu661 9 Bacteria;Firmicutes;Clostridia;Clostridiales;Lachnospiraceae  
Otu919 10 Bacteria;Firmicutes;Clostridia;Clostridiales;Lachnospiraceae  
Otu925 3 Bacteria;Bacteroidetes  
Otu924 31 Bacteria;Bacteroidetes  
Otu888 4 Bacteria;Firmicutes;Clostridia;Clostridiales;EtOH8  
Otu889 9 Bacteria;Bacteroidetes;Flavobacteriia;Flavobacteriales;Flavobacteriaceae;Aequorivita  
Otu866 159 Bacteria;Proteobacteria;Gammaproteobacteria;Pseudomonadales;Moraxellaceae;Acinetobacter  
Otu867 25 Bacteria;Cyanobacteria;4C0d-2;YS2  
Otu864 3 Bacteria;Firmicutes;Clostridia;Clostridiales  
Otu865 3 Bacteria;Bacteroidetes;Bacteroidia;Bacteroidales;Prevotellaceae;Prevotella  
Otu862 3 Bacteria;Firmicutes;Clostridia;Clostridiales  
Otu863 2 Bacteria  
Otu860 7 Bacteria;Firmicutes;Clostridia;Clostridiales;Ruminococcaceae  
Otu861 2 Bacteria;Actinobacteria;Actinobacteria;Actinomycetales;Microbacteriaceae;Pseudoclavibacter;Pseudoclavibacter\_bifida  
Otu1091 3 Bacteria;Bacteroidetes;Flavobacteriia;Flavobacteriales;Flavobacteriaceae  
Otu912 3 Bacteria;Firmicutes;Clostridia;Clostridiales;Lachnospiraceae;Coprococcus  
Otu1093 4 Bacteria;Firmicutes;Clostridia;Clostridiales;Lachnospiraceae  
Otu920 2 Bacteria;Proteobacteria;Betaproteobacteria;Burkholderiales;Alcaligenaceae  
Otu1095 5 Bacteria;Firmicutes;Clostridia;Clostridiales;Ruminococcaceae

Otu1094 53 Bacteria;Proteobacteria;Gammaproteobacteria  
Otu868 11 Bacteria;Firmicutes;Clostridia;Clostridiales  
Otu869 6 Bacteria;Bacteroidetes  
Otu1073 2 Bacteria;Bacteroidetes;Bacteroidia;Bacteroidales  
Otu668 60 Bacteria;Firmicutes;Clostridia;Clostridiales;Christensenellaceae  
Otu669 4 Bacteria;Firmicutes;Clostridia;Clostridiales;Ruminococcaceae  
Otu1015 7 Bacteria;Proteobacteria;Betaproteobacteria;Burkholderiales;Alcaligenaceae;Sutterella  
Otu886 2 Bacteria;Bacteroidetes;Bacteroidia;Bacteroidales;Porphyromonadaceae;Dysgonomonas  
Otu1014 2 Bacteria;Actinobacteria;Coriobacteriia;Coriobacteriales;Coriobacteriaceae  
Otu598 9 Bacteria;Verrucomicrobia;Verruco-5;WCHB1-41;RFP12  
Otu599 4 Bacteria;Firmicutes;Clostridia;Clostridiales;Tissierellaceae;Sedimentibacter  
Otu1090 4 Bacteria;Bacteroidetes;Bacteroidia;Bacteroidales;Bacteroidaceae;Bacteroides  
Otu592 3780 Bacteria;Bacteroidetes;Bacteroidia;Bacteroidales;Prevotellaceae;Prevotella;Prevotella\_copri  
Otu593 3 Bacteria;Proteobacteria;Gammaproteobacteria  
Otu590 10 Bacteria;Verrucomicrobia;Verruco-5;WCHB1-41;RFP12  
Otu591 11 Bacteria;Firmicutes;Clostridia;Clostridiales;Mogibacteriaceae  
Otu596 7 Bacteria;Firmicutes;Erysipelotrichi;Erysipelotrichales;Erysipelotrichaceae;RFN20  
Otu597 4 Bacteria;Bacteroidetes;Bacteroidia;Bacteroidales;Bacteroidaceae;Bacteroides;Bacteroides\_uniformis  
Otu594 3 Bacteria;Proteobacteria;Alphaproteobacteria  
Otu595 7 Bacteria;Bacteroidetes;Bacteroidia;Bacteroidales  
Otu1019 2 Bacteria;Thermi;Deinococci;Deinococcales;Trueperaceae;B-42  
Otu502 11 Bacteria;Tenericutes;Mollicutes;Acholeplasmatales;Acholeplasmataceae;Acholeplasma  
Otu882 2 Bacteria;Firmicutes;Clostridia;Clostridiales  
Otu931 3 Bacteria  
Otu1018 9 Bacteria;Verrucomicrobia;Verrucomicrobiae;Verrucomicrobiales;Verrucomicrobiaceae;Akkermansia  
Otu883 3 Bacteria;Firmicutes;Clostridia;Clostridiales;Ruminococcaceae



Otu1152 2 Bacteria;Firmicutes;Clostridia;Clostridiales;Ruminococcaceae  
Otu567 5 Bacteria;Verrucomicrobia;Verruco-5;WCHB1-41;RFP12  
Otu566 12 Bacteria;Bacteroidetes;Sphingobacteriia;Sphingobacteriales;Sphingobacteriaceae;Sphingobacterium  
Otu565 9 Bacteria;Firmicutes;Clostridia;Clostridiales  
Otu564 10 Bacteria;Firmicutes;Clostridia;Clostridiales;Tissierellaceae;Peptoniphilus  
Otu448 25 Bacteria;Firmicutes;Clostridia;Clostridiales;Lachnospiraceae  
Otu449 9 Bacteria;Tenericutes;Mollicutes;RF39  
Otu561 46 Bacteria;Firmicutes;Clostridia;Clostridiales  
Otu560 16 Bacteria;Spirochaetes;Spirochaetes;Spirochaetales;Spirochaetaceae;Treponema  
Otu444 12 Bacteria;Firmicutes;Clostridia;Clostridiales;Ruminococcaceae  
Otu445 17 Bacteria;Firmicutes;Clostridia;Clostridiales;Christensenellaceae  
Otu446 19 Bacteria;Firmicutes;Clostridia;Clostridiales  
Otu447 20 Bacteria;Firmicutes;Clostridia;Clostridiales;Ruminococcaceae  
Otu440 20 Bacteria;Firmicutes;Clostridia;Clostridiales  
Otu441 14 Bacteria;Bacteroidetes;Bacteroidia;Bacteroidales  
Otu442 45 Bacteria;Firmicutes;Clostridia;Clostridiales;Veillonellaceae;Phascolarctobacterium  
Otu443 18 Bacteria;Firmicutes;Bacilli;Turicibacterales;Turicibacteraceae;Turicibacter  
Otu932 3 Bacteria;Cyanobacteria;4C0d-2;YS2  
Otu1156 4 Bacteria;Firmicutes;Clostridia;Clostridiales;Clostridiaceae;Clostridium  
Otu1008 5 Bacteria;Bacteroidetes;Bacteroidia;Bacteroidales;Porphyromonadaceae;Dysgonomonas  
Otu508 11 Bacteria;Bacteroidetes;Bacteroidia;Bacteroidales;Paraprevotellaceae;CF231  
Otu1006 2 Bacteria;Bacteroidetes;Bacteroidia;Bacteroidales;Porphyromonadaceae;Parabacteroides  
Otu1007 2 Bacteria;Firmicutes;Clostridia;Clostridiales  
Otu1004 3 Bacteria;Firmicutes;Clostridia;Clostridiales;Ruminococcaceae  
Otu1005 5 Bacteria;Firmicutes;Clostridia;Clostridiales  
Otu1002 3 Bacteria;Firmicutes;Clostridia;Clostridiales;Ruminococcaceae

Otu1003 14 Bacteria;Bacteroidetes;Bacteroidia;Bacteroidales;Prevotellaceae;Prevotella  
Otu1000 6 Bacteria;Proteobacteria;Gammaproteobacteria;Aeromonadales;Aeromonadaceae  
Otu1001 90 Bacteria;Proteobacteria;Alphaproteobacteria;Rhizobiales  
Otu750 2 Bacteria;Firmicutes;Clostridia;Clostridiales  
Otu969 2 Bacteria;Firmicutes;Clostridia;Clostridiales;Ruminococcaceae  
Otu968 4 Bacteria;Firmicutes;Clostridia;Clostridiales;Ruminococcaceae  
Otu219 208 Bacteria;Firmicutes;Clostridia;Clostridiales;Ruminococcaceae  
Otu218 104 Bacteria;Firmicutes;Clostridia;Clostridiales;Ruminococcaceae;Ruminococcus  
Otu749 2 Bacteria;Firmicutes;Clostridia;Clostridiales  
Otu748 4 Bacteria;Bacteroidetes;Bacteroidia;Bacteroidales;Prevotellaceae;Prevotella  
Otu215 81 Bacteria;Tenericutes;Mollicutes;Acholeplasmatales;Acholeplasmataceae;Acholeplasma  
Otu214 72 Bacteria;Firmicutes;Clostridia;Clostridiales;Lachnospiraceae  
Otu217 61 Bacteria;Firmicutes;Clostridia;Clostridiales;Lachnospiraceae  
Otu216 100 Bacteria;Verrucomicrobia;Verruco-5;WCHB1-41;RFP12  
Otu211 62 Bacteria;Firmicutes;Clostridia;Clostridiales;Christensenellaceae  
Otu210 154 Bacteria;Bacteroidetes;Bacteroidia;Bacteroidales;S24-7  
Otu213 50 Bacteria;Firmicutes;Bacilli;Bacillales;Paenibacillaceae;Paenibacillus  
Otu212 97 Bacteria;Firmicutes;Clostridia;Clostridiales;Ruminococcaceae;Ruminococcus  
Otu398 109 Bacteria;Firmicutes;Clostridia;Clostridiales;Mogibacteriaceae  
Otu753 16 Bacteria;Bacteroidetes;Bacteroidia;Bacteroidales;Prevotellaceae;Prevotella;Prevotella\_copri  
Otu905 4 Bacteria;Firmicutes;Clostridia;Clostridiales;Lachnospiraceae;Coprococcus  
Otu399 51 Bacteria;Firmicutes;Clostridia;Clostridiales  
Otu978 8 Bacteria;Firmicutes;Clostridia;Clostridiales  
Otu979 2 Bacteria;Firmicutes;Clostridia;Clostridiales;Lachnospiraceae  
Otu691 5 Bacteria;Actinobacteria;Coriobacteriia;Coriobacteriales;Coriobacteriaceae;Slackia  
Otu690 19 Bacteria;Firmicutes;Clostridia;Clostridiales;Ruminococcaceae

Otu693 13 Bacteria;Bacteroidetes;Bacteroidia;Bacteroidales  
Otu692 8 Bacteria;Firmicutes;Bacilli;Lactobacillales;Lactobacillaceae;Lactobacillus;Lactobacillus\_mucosae  
Otu695 4 Bacteria;Tenericutes;Mollicutes;RF39  
Otu694 3 Bacteria;Elusimicrobia;Elusimicrobia;Elusimicrobiales;Elusimicrobiaceae  
Otu697 16 Bacteria;Proteobacteria;Betaproteobacteria;Burkholderiales;Alcaligenaceae;Sutterella  
Otu696 12 Bacteria;Fibrobacteres;Fibrobacteria;Fibrobacterales;Fibrobacteraceae;Fibrobacter;Fibrobacter\_succinogenes  
Otu699 7 Bacteria;Proteobacteria;Gammaproteobacteria;Enterobacteriales;Enterobacteriaceae  
Otu698 6 Bacteria;Proteobacteria;Betaproteobacteria;Burkholderiales;Alcaligenaceae  
Otu757 2 Bacteria;Firmicutes;Clostridia;Clostridiales;Ruminococcaceae  
Otu361 16 Bacteria;Tenericutes;Mollicutes;Acholeplasmatales;Acholeplasmataceae;Acholeplasma  
Otu360 145 Bacteria;Firmicutes;Clostridia;Clostridiales;Tissierellaceae  
Otu363 14 Bacteria;Firmicutes;Clostridia;Clostridiales;Clostridiaceae;Clostridium  
Otu362 32 Bacteria;Tenericutes;Mollicutes;RF39  
Otu365 60 Bacteria;Firmicutes;Clostridia;Clostridiales;Ruminococcaceae;Oscillospira  
Otu364 96 Bacteria;Firmicutes;Clostridia;Clostridiales;Ruminococcaceae;Oscillospira  
Otu367 77 Bacteria;Firmicutes;Clostridia;Clostridiales;Lachnospiraceae;Anaerostipes  
Otu366 27 Bacteria;Proteobacteria;Betaproteobacteria;Rhodocyclales;Rhodocyclaceae;Thauera  
Otu369 34 Bacteria;Bacteroidetes;Flavobacteriia;Flavobacteriales;Weeksellaceae  
Otu368 27 Bacteria;Bacteroidetes;Bacteroidia;Bacteroidales;S24-7  
Otu613 3 Bacteria;Spirochaetes;Spirochaetes;Sphaerochaetales;Sphaerochaetaceae;Sphaerochaeta  
Otu621 9 Bacteria;Firmicutes;Clostridia;Clostridiales;Mogibacteriaceae  
Otu130 113 Bacteria;Tenericutes;Mollicutes;Acholeplasmatales;Acholeplasmataceae;Acholeplasma  
Otu131 122 Bacteria;Proteobacteria;Gammaproteobacteria;Thiotrichales;Piscirickettsiaceae;Methylophaga  
Otu132 158 Bacteria;Proteobacteria;Gammaproteobacteria  
Otu133 158 Bacteria;Firmicutes;Clostridia;Clostridiales;Ruminococcaceae;Oscillospira  
Otu134 123 Bacteria;Bacteroidetes;Bacteroidia;Bacteroidales;Paraprevotellaceae;Prevotella

Otu135 113 Bacteria;Bacteroidetes;Bacteroidia;Bacteroidales  
Otu136 160 Bacteria;Bacteroidetes;Flavobacteriia;Flavobacteriales;Flavobacteriaceae  
Otu137 266 Bacteria;Spirochaetes;Spirochaetes;Spirochaetales;Spirochaetaceae;Treponema  
Otu138 79 Bacteria;Firmicutes;Clostridia;Clostridiales  
Otu139 95 Bacteria;Proteobacteria;Gammaproteobacteria;Aeromonadales;Succinivibrionaceae  
Otu614 15 Bacteria;Firmicutes;Clostridia;Clostridiales;Clostridiaceae  
Otu14 4482 Bacteria;Bacteroidetes;Bacteroidia;Bacteroidales;Porphyromonadaceae  
Otu15 4842 Bacteria;Bacteroidetes;Bacteroidia;Bacteroidales;Prevotellaceae;Prevotella  
Otu16 3495 Bacteria;Bacteroidetes;Bacteroidia;Bacteroidales;Prevotellaceae;Prevotella;Prevotella\_copri  
Otu17 2411 Bacteria;Bacteroidetes;Bacteroidia;Bacteroidales;Paraprevotellaceae;YRC22  
Otu10 4362 Bacteria;Proteobacteria;Gammaproteobacteria;Xanthomonadales;Xanthomonadaceae;Ignatzschineria  
Otu11 3562 Bacteria;Bacteroidetes;Bacteroidia;Bacteroidales;Prevotellaceae;Prevotella  
Otu12 3064 Bacteria;Firmicutes;Bacilli;Lactobacillales;Streptococcaceae;Streptococcus;Streptococcus\_luteciae  
Otu13 2875 Bacteria;Bacteroidetes;Sphingobacteriia;Sphingobacteriales;Sphingobacteriaceae  
Otu916 3 Bacteria;Firmicutes;Clostridia;Clostridiales;Ruminococcaceae  
Otu917 2 Bacteria;Firmicutes  
Otu914 195 Bacteria;Firmicutes;Clostridia;Clostridiales;Ruminococcaceae  
Otu616 3 Bacteria;Firmicutes  
Otu18 2849 Bacteria;Bacteroidetes;Flavobacteriia;Flavobacteriales;Flavobacteriaceae;Flavobacterium;Flavobacterium\_gelidilacus  
Otu19 1101 Bacteria;Proteobacteria;Gammaproteobacteria;Aeromonadales;Succinivibrionaceae;Succinivibrio  
Otu910 5 Bacteria;Firmicutes;Clostridia;Clostridiales;Ruminococcaceae  
Otu911 2 Bacteria;Bacteroidetes;Bacteroidia;Bacteroidales  
Otu1086 2 Bacteria  
Otu706 19 Bacteria;Actinobacteria;Coriobacteriia;Coriobacteriales;Coriobacteriaceae  
Otu1063 44 Bacteria;Firmicutes;Bacilli;Lactobacillales;Lactobacillaceae;Lactobacillus  
Otu951 14 Bacteria;Firmicutes;Clostridia;Clostridiales;Ruminococcaceae

Otu1087 6 Bacteria;Firmicutes;Clostridia;Clostridiales;Ruminococcaceae  
Otu628 7 Bacteria;Firmicutes;Clostridia;Clostridiales  
Otu629 15 Bacteria;Proteobacteria;Alphaproteobacteria;Sphingomonadales  
Otu624 12 Archaea;Euryarchaeota;Thermoplasmata;E2;Methanomassiliicoccaceae;vadinCA11  
Otu625 6 Bacteria;Proteobacteria;Gammaproteobacteria;Oceanospirillales;Halomonadaceae;Halomonas  
Otu626 9 Bacteria;Firmicutes;Clostridia;Clostridiales;Ruminococcaceae  
Otu627 3 Bacteria;Firmicutes;Clostridia;Clostridiales  
Otu189 71 Bacteria;Firmicutes;Clostridia;Clostridiales;Tissierellaceae;Peptoniphilus  
Otu188 171 Bacteria;Firmicutes;Clostridia;Clostridiales;Ruminococcaceae;Ruminococcus  
Otu622 17 Bacteria;Firmicutes;Clostridia;Clostridiales;Tissierellaceae  
Otu623 5 Bacteria;Cyanobacteria;4C0d-2;YS2  
Otu185 120 Bacteria;Bacteroidetes;Bacteroidia;Bacteroidales  
Otu184 168 Bacteria;Spirochaetes;Spirochaetes;Spirochaetales;Spirochaetaceae;Treponema  
Otu187 138 Bacteria;Firmicutes;Clostridia;Clostridiales;Lachnospiraceae  
Otu186 150 Bacteria;Firmicutes;Bacilli;Lactobacillales;Aerococcaceae;Facklamia  
Otu181 118 Bacteria;Bacteroidetes;Bacteroidia;Bacteroidales;S24-7  
Otu180 68 Bacteria;Bacteroidetes;Bacteroidia;Bacteroidales;Porphyromonadaceae  
Otu183 121 Bacteria;Firmicutes;Clostridia;Clostridiales;Tissierellaceae;Sedimentibacter  
Otu182 1850 Bacteria;Proteobacteria;Gammaproteobacteria;Pseudomonadales;Pseudomonadaceae
