# Supplementary material for: Chrysomya megacephala larvae feeding favourably influences manure microbiome, heavy metal stability and greenhouse gas emissions
Source: PubMed Central journal article supplement (PMC5902325; doi:10.1111/1751-7915.13253), 2018-03-14
Supplement: MBT2-11-498-s005.pdf [file MBT2-11-498-s005.pdf]

**Table S3a bray\_curtis\_Beta\_diversity**

|        | RSM.1    | RSM.2    | RSM.3    | NSM.1    | NSM.2    | NSM.3    | CMSM.1   | CMSM.2   | CMSM.3   |
|--------|----------|----------|----------|----------|----------|----------|----------|----------|----------|
| RSM.1  | 0        | 0.219592 | 0.222028 | 0.361017 | 0.350972 | 0.36266  | 0.697348 | 0.651782 | 0.650443 |
| RSM.2  | 0.219592 | 0        | 0.20277  | 0.311927 | 0.337101 | 0.323823 | 0.699341 | 0.638246 | 0.641079 |
| RSM.3  | 0.222028 | 0.20277  | 0        | 0.357514 | 0.358416 | 0.350342 | 0.706488 | 0.653162 | 0.653962 |
| NSM.1  | 0.361017 | 0.311927 | 0.357514 | 0        | 0.312442 | 0.245427 | 0.685705 | 0.644827 | 0.631275 |
| NSM.2  | 0.350972 | 0.337101 | 0.358416 | 0.312442 | 0        | 0.327079 | 0.635498 | 0.585024 | 0.585052 |
| NSM.3  | 0.36266  | 0.323823 | 0.350342 | 0.245427 | 0.327079 | 0        | 0.689934 | 0.646197 | 0.643487 |
| CMSM.1 | 0.697348 | 0.699341 | 0.706488 | 0.685705 | 0.635498 | 0.689934 | 0        | 0.290299 | 0.305048 |
| CMSM.2 | 0.651782 | 0.638246 | 0.653162 | 0.644827 | 0.585024 | 0.646197 | 0.290299 | 0        | 0.318386 |
| CMSM.3 | 0.650443 | 0.641079 | 0.653962 | 0.631275 | 0.585052 | 0.643487 | 0.305048 | 0.318386 | 0        |

**Table S3b eighted\_unifrac\_Beta\_diversity**

|        | RSM.1    | RSM.2    | RSM.3    | NSM.1    | NSM.2    | NSM.3    | CMSM.1   | CMSM.2   | CMSM.3   |
|--------|----------|----------|----------|----------|----------|----------|----------|----------|----------|
| RSM.1  | 0        | 0.080547 | 0.115246 | 0.314052 | 0.342793 | 0.352133 | 0.601852 | 0.587717 | 0.580195 |
| RSM.2  | 0.080547 | 0        | 0.066211 | 0.298737 | 0.371242 | 0.345608 | 0.618601 | 0.602909 | 0.595324 |
| RSM.3  | 0.115246 | 0.066211 | 0        | 0.30456  | 0.40272  | 0.340769 | 0.6376   | 0.622402 | 0.61514  |
| NSM.1  | 0.314052 | 0.298737 | 0.30456  | 0        | 0.300168 | 0.140051 | 0.615331 | 0.596394 | 0.591735 |
| NSM.2  | 0.342793 | 0.371242 | 0.40272  | 0.300168 | 0        | 0.393612 | 0.481844 | 0.463359 | 0.456958 |
| NSM.3  | 0.352133 | 0.345608 | 0.340769 | 0.140051 | 0.393612 | 0        | 0.677944 | 0.659787 | 0.659011 |
| CMSM.1 | 0.601852 | 0.618601 | 0.6376   | 0.615331 | 0.481844 | 0.677944 | 0        | 0.051049 | 0.057274 |
| CMSM.2 | 0.587717 | 0.602909 | 0.622402 | 0.596394 | 0.463359 | 0.659787 | 0.051049 | 0        | 0.03333  |
| CMSM.3 | 0.580195 | 0.595324 | 0.61514  | 0.591735 | 0.456958 | 0.659011 | 0.057274 | 0.03333  | 0        |

**Table S3c unweighted\_unifrac**

|       | RSM.1    | RSM.2    | RSM.3    | NSM.1    | NSM.2    | NSM.3    | CMSM.1   | CMSM.2   | CMSM.3   |
|-------|----------|----------|----------|----------|----------|----------|----------|----------|----------|
| RSM.1 | 0        | 0.219592 | 0.222028 | 0.361017 | 0.350972 | 0.36266  | 0.697348 | 0.651782 | 0.650443 |
| RSM.2 | 0.219592 | 0        | 0.20277  | 0.311927 | 0.337101 | 0.323823 | 0.699341 | 0.638246 | 0.641079 |

|        |          |          |          |          |          |          |          |          |          |
|--------|----------|----------|----------|----------|----------|----------|----------|----------|----------|
| RSM.3  | 0.222028 | 0.20277  | 0        | 0.357514 | 0.358416 | 0.350342 | 0.706488 | 0.653162 | 0.653962 |
| NSM.1  | 0.361017 | 0.311927 | 0.357514 | 0        | 0.312442 | 0.245427 | 0.685705 | 0.644827 | 0.631275 |
| NSM.2  | 0.350972 | 0.337101 | 0.358416 | 0.312442 | 0        | 0.327079 | 0.635498 | 0.585024 | 0.585052 |
| NSM.3  | 0.36266  | 0.323823 | 0.350342 | 0.245427 | 0.327079 | 0        | 0.689934 | 0.646197 | 0.643487 |
| CMSM.1 | 0.697348 | 0.699341 | 0.706488 | 0.685705 | 0.635498 | 0.689934 | 0        | 0.290299 | 0.305048 |
| CMSM.2 | 0.651782 | 0.638246 | 0.653162 | 0.644827 | 0.585024 | 0.646197 | 0.290299 | 0        | 0.318386 |
| CMSM.3 | 0.650443 | 0.641079 | 0.653962 | 0.631275 | 0.585052 | 0.643487 | 0.305048 | 0.318386 | 0        |
